# Supplementary material for: Epigenetic alterations in longevity regulators, reduced life span, and exacerbated aging-related pathology in old father offspring mice
Source: PubMed Central journal article supplement — Proc Natl Acad Sci U S A. 2018 Feb 21;115(10):E2348–57. doi: 10.1073/pnas.1707337115 (PMC5877957; doi:10.1073/pnas.1707337115), 2018-02-21
Supplement: pnas.1707337115.sapp.pdf [file pnas.1707337115.sapp.pdf]

## 1 **SI Results**

2  
3 **A 7-weeks rapamycin treatment regimen did not modify altered DNA methylation in**  
4 **sperm of aged mice.** To begin to address whether rapamycin treatment of old fathers has  
5 an effect on DNA methylation changes in their sperm, we subjected young (3 months old)  
6 and old (22 months old) mice to a 7-weeks treatment with either rapamycin or vehicle control  
7 prior to sperm collection (**Fig. S8A**). Notably and consistent with earlier observations (1),  
8 rapamycin had a strong suppressive effect on spermatogenesis, resulting in lower sperm  
9 counts in treated mice compared to vehicle controls (**Fig. S8B**). We focused our analysis of  
10 age-related DNA methylation changes on a ~2kb genomic region upstream of and  
11 overlapping with *Gm7120* which was among the top hypermethylated regions in old father  
12 sperm as well as old father offspring tissue (**Tables S1** and **S7**). Targeted bisulfite  
13 sequencing of this area confirmed CpG hypermethylation in old father sperm (**Fig. S8C,D**).  
14 Our data indicate that a 7-weeks rapamycin treatment regimen was insufficient to modify  
15 age-related hypermethylation of this genomic region (**Fig. S8C,D**). It remains to be  
16 determined if a longer-term rapamycin treatment during the course of natural aging prevents  
17 age-related differential methylation at this locus. Additionally, further studies are required to  
18 address whether rapamycin treatment, either short-term or more chronic in nature, can  
19 influence age-related epigenetic changes at other genomic positions.

20  
21 **Immune system changes in old father offspring mice.** The epigenetic and transcriptional  
22 analyses outlined above also highlight alterations in immune regulators (including mTOR-  
23 related cell signaling) in aged fathers and their offspring. To address whether these were  
24 associated with changes in the composition of immune cell populations in old father offspring  
25 mice, we quantified leukocyte populations in the peripheral blood of OFO and YFO mice. We  
26 noted an increased abundance of several T cell subpopulations in OFO mice, including  
27 CD44<sup>high</sup>-expressing CD4<sup>+</sup> T cells and CD44<sup>high</sup>-expressing CD8<sup>+</sup> T cells, indicating an  
28 increase in the proportion of activated/memory T cells in these animals (**Fig. S9**). The cellular

29 changes are in line with observations in mice with altered mTOR signaling (1, 2). Together,  
30 these data are consistent with the pro-inflammatory transcriptional changes in OFO mice and  
31 suggest an altered immunological state in these animals.

32

33 **Metabolic alterations in old father offspring mice.** We also determined plasma glucose  
34 and lipid concentrations in young and old father offspring mice. These analyses showed  
35 changes in the temporal plasma glucose profile following bolus glucose injection in OFO  
36 mice (**Fig. S10A**), as well as elevated plasma cholesterol concentrations (**Fig. S10B**) in OFO  
37 mice compared to YFO animals. These findings indicate that metabolic alterations could  
38 contribute to aging trajectories in OFO mice.

39

40 **Altered learning and memory in old father offspring mice.** Because our data revealed  
41 epigenetic, gene expression and biochemical changes in hippocampal tissue of old father  
42 offspring mice, we included in our analyses an assessment of learning and memory as a  
43 function of paternal age. First, we performed a meta-analysis of a large fear conditioning  
44 dataset that involved mice with a range of different parental ages (for details, see **SI**  
45 **Methods**). Stratification of the dataset by paternal age revealed an inverted U-shaped  
46 relationship of paternal age and freezing behavior in offspring mice (**Fig. S11A**) which is akin  
47 to previously reported paternal age effects on measures of cognitive function in humans (3-  
48 5). In contrast, we did not note any obvious maternal age effect on freezing behavior in  
49 offspring when we stratified the dataset by maternal age (with the range of maternal ages  
50 being limited due to age-related infertility in females) (**Fig. S11B**). We also analyzed spatial  
51 learning in the Morris water maze and in an object-place-recognition learning task in offspring  
52 derived from either young or old fathers (for details, see **SI Methods**). Our analyses showed  
53 decreased probe trial-associated target quadrant occupancy in the Morris water maze in  
54 OFO mice (for details, see **SI Methods** and **Fig. S11C-E**). OFO mice also showed similar  
55 exploration times of an object relocated to a novel position and an object in a familiar location  
56 during a probe trial in an object-place-recognition learning task (for details, see **SI Methods**

57 and **Fig. S11F**). Together, these data add to growing evidence indicating paternal age effects  
58 on behavior and cognitive functions in animal models, as well as in humans (3-9).

59

60

## 61 **SI Discussion**

62

63 We found a subset of traits to differ between the young adult YFO and OFO group (e.g.  
64 plasma cholesterol, learning and memory), while other differences emerged during the  
65 course of natural aging in YFO and OFO mice (many histopathological measures),  
66 suggesting that these differences reflect an altered aging rate in OFO mice (i.e., an altered  
67 trajectory of the age-dependent change in the corresponding parameters). Together with our  
68 epigenetic findings this observation raises the possibility that inherited aging-associated  
69 epigenetic changes in the male germline influence the trajectory of age-dependent tissue  
70 changes in the next generation.

71

72 Stratification of a large fear conditioning dataset by paternal age suggested that freezing  
73 behavior in offspring is highest in offspring of fathers of an intermediate age range (3-12  
74 months) and is reduced in offspring of older fathers (>12 months), as well as in offspring of  
75 very young fathers (<3 months) (**Fig. S11A**). Interestingly, such an inverted U-shaped  
76 relationship of paternal age and offspring traits has also been observed with regards to  
77 cognitive outcome measures in human populations (3-5). These findings indicate that very  
78 young paternal ages may also be associated with phenotypic consequences in the next  
79 generation. Future studies should examine the scope of these effects and assess sperm  
80 epigenetic profiles during sexual maturation (i.e., comparing adolescent and adult mice).

81

82 Our study identified epigenetic and phenotypic changes in the F1 offspring of old fathers. It  
83 remains to be determined if the F2 offspring of old fathers feature epigenetic and/or  
84 phenotypic alterations similar to the ones described here for F1 progeny. The observation

85 that *Gm7120*-associated sequences overlapping with the ones that we found to be  
86 hypermethylated in old father sperm and in old father offspring tissue are resistant to  
87 demethylation in primordial germ cells (10, 11) suggests that at least some of the age-related  
88 epigenetic changes might be passed on to second generation offspring.

89

90

## 91 **SI Methods**

92

93 *FACS-based analysis of peripheral blood leukocytes.* FACS-based analyses of leukocyte  
94 populations in the peripheral blood were performed as previously described (1). The cell  
95 pellet isolated from whole blood was dissolved in NH<sub>4</sub>Cl-based, Tris-buffered erythrocyte  
96 lysis solution. After washing and blocking steps, cells were stained with fluorescence-  
97 conjugated monoclonal antibodies (Pharmingen) and propidium iodide was added for the  
98 identification of dying/dead cells. Cells were sorted using a three-laser 10-color flow  
99 cytometer (LSRII, Becton Dickinson; Gallios, Beckman Coulter). Living cells were gated  
100 using their SSC/CD45 signal to isolate leukocyte populations. A total number of 10,000-  
101 30,000 living CD45<sup>+</sup> cells per sample were analyzed. We analyzed the abundance of T cells  
102 (CD3<sup>+</sup>), CD4<sup>+</sup> T cells, CD8<sup>+</sup> T cells, CD25<sup>+</sup> CD4<sup>+</sup> T cells,  $\gamma\delta$  T cells, CD44<sup>high</sup>-expressing  
103 CD4<sup>+</sup> T cells, CD44<sup>high</sup>-expressing CD8<sup>+</sup> T cells, CD62L-expressing CD4<sup>+</sup> T cells, as well as  
104 CD62L-expressing CD8<sup>+</sup> T cells in young father offspring mice and old father offspring  
105 animals (YFO, *n* = 27 mice from 11 litters; OFO, *n* = 29 mice from 10 litters). Statistical  
106 analyses were performed using unpaired, two-tailed t-tests.

107

108 *Intraperitoneal glucose tolerance test and plasma cholesterol concentration measurements.*

109 For the intraperitoneal glucose tolerance test (YFO, *n* = 27 mice from 11 litters; OFO, *n* = 29  
110 mice from 10 litters), food was withdrawn overnight. Mice were injected intraperitoneally with  
111 2 g glucose/kg body mass and blood samples were collected from the tail tip at 15, 30, 60  
112 and 120 min after glucose injection. Data were analyzed by two-way ANOVA with the

113 between-subjects factor paternal age and the within-subjects factor time point. Plasma  
114 cholesterol concentrations were measured using a Beckman-Coulter AU 480 autoanalyzer  
115 (YFO,  $n = 27$  mice from 11 litters; OFO,  $n = 29$  mice from 10 litters). Statistical analysis was  
116 performed using an unpaired, two-tailed t-test.

117  
118 *Behavior.* To begin to test for possible paternal age effects on learning and memory, we  
119 performed a meta-analysis of a large fear conditioning dataset in WT mice (mixed BL/6-129  
120 genetic background), which we stratified by paternal age (in 3 months age bins; for numbers  
121 of animals, see **Fig. S11A**). After a two-minute baseline, mice were subjected to tone-  
122 signaled conditioning (30s tone co-terminating with a 2s, 0.75 mA shock) (12). Freezing  
123 levels assessed during the last two minutes of the fear conditioning session were compared  
124 across paternal age groups via one-way ANOVA. The hidden version of the Morris water  
125 maze was performed as previously described (13) with the following modifications: After  
126 handling, F1 offspring of old and young fathers (YFO,  $n = 25$  mice from 10 litters; OFO,  $n =$   
127  $17$  mice from 7 litters) received 2 daily training trials for 7 consecutive days. Escape latencies  
128 were analyzed by two-way ANOVA with the between-subjects factor paternal age and the  
129 within-subjects factor training day. To evaluate the accuracy with which the animals had  
130 learned the position of the escape platform, we performed probe trial analyses comparing the  
131 time that mice spent searching in the target quadrant (which previously contained the escape  
132 platform) vs. the other quadrants. An overall analysis of quadrant occupancies was carried  
133 out by two-way ANOVA with the between-subjects factor paternal age and the within-subjects  
134 factor quadrant. Additionally, swim speed and target quadrant occupancy were analyzed by  
135 unpaired t-test (OFO vs. YFO). The object-place-recognition learning task was conducted as  
136 previously described (1). In brief, after handling and habituation to the test arena, animals  
137 (YFO,  $n = 16$  mice from 6 litters; OFO,  $n = 14$  mice from 6 litters) received a single 16-min  
138 training session during which two identical objects (small glass bottles) were placed in  
139 defined locations of the test arena. On the next day, we performed a single test session, in  
140 the context of which one of the objects was moved to a new location, while the position of the

141 other object remained unaltered. The time the animals spent exploring the object in the novel  
142 location and the known location during the test was hand-scored by an experienced observer  
143 from the videotape. Exploration times were analyzed by two-way ANOVA with the between-  
144 subjects factor paternal age (OFO/YFO) and the within-subjects factor object location  
145 (novel/familiar). Additionally, exploration times of the object in the novel vs. familiar location  
146 were compared by unpaired t-tests within groups (OFO, YFO).

147

148 *Histology-based fluorescence intensity analyses.* Histology-based fluorescence intensity  
149 analyses were carried out to assess the phosphorylation of ribosomal protein S6 at  
150 Ser240/244 within spermatogenic cell lineages in testis derived from young (3 months old)  
151 and old (20 months old) C57BL/6J Rj mice. Tile scan Z stack maximum intensity projections  
152 were collected from immunolabeled testis sections (12  $\mu$ m thick) by collecting a 6 x 6 array of  
153 1024 x 1024 resolution confocal images (Zeiss LSM 700). ROIs of the seminiferous tubules  
154 were made by a researcher blind to experimental condition in stitched mosaic images leaving  
155 the basal spermatogonia layer excluded from the ROI. Then total corrected fluorescence  
156 intensity was measured from all ROIs in the p-S6 channel (488 wavelength) using the CTCF  
157 method (14), taking into account background fluorescence. Because the number of cells  
158 contained in the seminiferous tubules could bias the average intensity results, we calculated  
159 the average cell number per tubule by using the auto threshold in FIJI (ImageJ, NIH) and  
160 then applying the waterfall binary correction to differentiate profiles that contact each other,  
161 and then obtaining a DAPI profile count only inside of the previously generated ROIs. The  
162 background corrected fluorescence was then normalized to the average cell number per  
163 tubule for that image. Data from young and old animals were analyzed by unpaired t-test.

164

165 *Rapamycin effects on aged sperm.* To examine the effects of rapamycin on DNA methylation  
166 changes in aged sperm, we treated young (3 months old;  $n = 9$  mice per group) and old male  
167 C57BL/6J Rj mice (22 months old;  $n = 9$  mice for the rapamycin-treated group and  $n = 5$  mice  
168 for the vehicle-treated group) with either oral rapamycin or vehicle control for a period of 7

169 weeks prior to sperm collection. Statistical analyses of sperm counts were performed by two-  
170 way ANOVA with the between-subjects factors age (young/old), as well as treatment  
171 (rapamycin/vehicle).

172

173 *Primary antibodies used for Western blots.* The following primary-antibodies were used for  
174 immunoblotting: rabbit monoclonal anti-mTOR (clone 7C10, 1:2000, Cell Signaling  
175 Technology, catalog no. 2983), rabbit monoclonal anti-Raptor (clone 24C12, 1:1000, Cell  
176 Signaling Technology, catalog no. 2280), rabbit monoclonal anti-Rictor (clone 53A2, 1:1000,  
177 Cell Signaling Technology, catalog no. 2114), rabbit monoclonal anti-phospho-4E-BP1  
178 (Thr37/46) (clone 236B4, 1:2000, Cell Signaling Technology, catalog no. 2855), rabbit  
179 monoclonal anti-4E-BP1 (clone53H11, 1:2000, Cell Signaling Technology, catalog no.  
180 9644), rabbit monoclonal anti-phospho-p70S6 Kinase (Thr389) (clone 108D2, 1:2000, Cell  
181 Signaling Technology, catalog no. 9234), rabbit monoclonal anti-p70S6 Kinase (clone 49D7,  
182 1:4000, Cell Signaling Technology, catalog no. 2708), rabbit polyclonal anti-phospho-S6  
183 ribosomal protein (Ser240/244) (1:2000, Cell Signaling Technology, catalog no. 2215),  
184 mouse monoclonal anti-S6 ribosomal protein (clone 54D2, 1:1000, Cell Signaling  
185 Technology, catalog no. 2317), mouse monoclonal anti-nitrotyrosine (clone 1A6, 1:10000,  
186 Merck Millipore, catalog no. 05-233), mouse monoclonal anti-actin (clone C4, 1:20000, MP  
187 Biomedicals, catalog no. 0869100).

188

189 *Mice for Ribotag experiments.* *Tsc2*<sup>+/-</sup> mice were generated as previously described (15) and  
190 were kept on a C57BL/6NCrl genetic background. The generation of Ribotag mice (16) and  
191  $\alpha$ CaMKII-Cre mice (17) (both lines were on a C57BL/6J genetic background) was also  
192 previously described. We crossed the  $\alpha$ CaMKII-Cre and Ribotag lines and selected female  
193 offspring positive for both transgenes for an additional cross with male *Tsc2*<sup>+/-</sup> mice.  
194 Experimental animals, used for gene expression analyses, were *Tsc2*<sup>+/-</sup> mutants and the  
195 corresponding wildtype littermate controls on the  $\alpha$ CaMKII-Cre/Ribotag background.

196

197 To assess the effects of rapamycin on hippocampal neuronal gene expression, we subjected

198 *Tsc2*<sup>+/-</sup>/ $\alpha$ CaMKII-Cre/Ribotag mice and WT/ $\alpha$ CaMKII-Cre/Ribotag mice to rapamycin or  
199 vehicle control treatment for a period of 6 weeks prior to sacrifice (rapamycin-treated *Tsc2*<sup>+/-</sup>  
200 / $\alpha$ CaMKII-Cre/Ribotag, *n* = 4 mice; vehicle-treated *Tsc2*<sup>+/-</sup>/ $\alpha$ CaMKII-Cre/Ribotag, *n* = 3 mice;  
201 rapamycin-treated WT/ $\alpha$ CaMKII-Cre/Ribotag, *n* = 5 mice; vehicle-treated WT/ $\alpha$ CaMKII-  
202 Cre/Ribotag, *n* = 5 mice).

203

204 *Ribotag immunohistochemistry.* Mouse brain halves were immersion fixed in formalin and  
205 embedded in paraffin. Four  $\mu$ m thick sections were deparaffinized through a series of  
206 xylenes and decreasing concentrations of ethanol. Epitope retrieval was performed using a  
207 vegetable steamer with slides in 10 mM citrate buffer, pH 8.0, for 30 minutes, then allowed to  
208 cool to room temperature. Endogenous peroxidase activity was quenched with 0.3% H<sub>2</sub>O<sub>2</sub> for  
209 30 minutes. Endogenous immunoglobulins were masked using a Mouse-on-Mouse  
210 horseradish peroxidase kit from Vector Labs (PK-2200) following the manufacturer's  
211 protocol. HA-7 antibody targeting the HA epitope of the RiboTag protein was purchased from  
212 Sigma (catalog no. H9659) and used at a 1:2000 dilution. Enzymatic substrate NovaRed  
213 from Vector Labs (SK-4800) was reacted for ~2 minutes, and sections were subsequently  
214 counterstained with hematoxylin, dehydrated, and cover slips were mounted with depex.  
215 Images were collected with Zen light software and a Zeiss AxioCam MRc camera mounted  
216 on a Zeiss Axio inverted microscope.

217

218 *Ribotag immunoprecipitation.* Cell-type-specific isolation of ribosome-associated mRNA from  
219 hippocampi of  $\alpha$ CaMKII-Cre/Ribotag mice was performed essentially as described before  
220 (16) but with a few modifications. In contrast to the original protocol, heparin was excluded  
221 from the polysome buffer, and supernatant was pre-cleared with magnetic beads, then  
222 incubated with anti-HA antibody 12CA5 (Roche Life Science), followed by incubation  
223 with fresh magnetic beads. Quality and quantity of immunoprecipitated mRNA and total RNA  
224 isolated from the input supernatant were verified by Qubit (Qubit RNA HS Assay Kit, Thermo  
225 Fisher Scientific) and Agilent 2100 Bioanalyzer (Agilent RNA 6000 Pico Kit, Agilent



226 Technologies). The following number of samples was processed and subjected to RNA-seq:  
227 rapamycin-treated *Tsc2*<sup>+/-</sup>/αCaMKII-Cre/Ribotag, *n* = 4 mice; vehicle-treated *Tsc2*<sup>+/-</sup>/αCaMKII-  
228 Cre/Ribotag, *n* = 3 mice; rapamycin-treated WT/αCaMKII-Cre/Ribotag, *n* = 5 mice; vehicle-  
229 treated WT/αCaMKII-Cre/Ribotag, *n* = 5 mice.

230

231 *Analysis of mutation rates.* Mutation rates were estimated by calling private variants using  
232 GATK (18) in RNA-seq data obtained from young and old father offspring animals (at 4 weeks  
233 of age; hippocampus as starting material; YFO, *n* = 6 mice from 6 litters; OFO, *n* = 6 mice  
234 from 6 litters). A base was declared as sufficiently covered in a sample if it had a depth of at  
235 least 20x. A mutation was included if (i) it had at least 20x coverage in a given sample, (ii) the  
236 genotype only existed in one sample, (iii) all of the other samples had coverage at that base  
237 and (iv) the genotype quality was 99 or greater. We compared estimated mutation rates  
238 across groups by unpaired, two-tailed t-test.

239

240 *Analysis of F1 hippocampus telomere length.* qRT-PCR was used to compare the values of  
241 relative telomere length of mouse hippocampal DNA between offsprings of young and old  
242 fathers according to the protocol of (19, 20). Relative telomere length (T/S) was expressed  
243 as a ratio of telomere repeat copy number (T) to a control single copy number gene (36B4)  
244 (S). qRT-PCR, was performed for both telomeres and 36B4 using 20 ng DNA samples in the  
245 same 96-well plate. Each reaction of the assay was of 25 μl total volume and included 12.5  
246 μl Sybr Green PCR Master Mix (Applied Biosystems). For telomere, 300 nM of each of the  
247 forward and reverse primers (Sigma, UK) were employed. Forward and reverse telomeric  
248 primers were 5' CGG TTT GTT TGG GTT TGG GTT TGG GTT TGG GTT TGG GTT 3' and 5'  
249 GGC TTG CCT TAC CCT TAC CCT TAC CCT TAC CCT TAC CCT TAC CCT 3' respectively. For 36B4  
250 gene, 300 nM forward primer, 500 nM reverse primer were utilized. Forward and reverse  
251 primers for the 36B4 portion of the assay were 5' ACT GGT CTA GGA CCC GAG AAG 3' and  
252 5' TCA ATG GTG CCT CTG GAG ATT 3', respectively. The reaction was performed on a  
253 lightcycler-480 (Roche) with the following conditions: 95°C for 10 minutes, followed by 40

254 repeats of 95°C for 15 seconds and 56°C for 1 minute, followed by a dissociation stage to  
255 monitor amplification specificity. qRT-PCR results were exported to Excel (Microsoft,  
256 Redmond, WA) and analyzed. The relative telomere length (T/S) was calculated as  
257 previously described in (19, 20). An unpaired, two-tailed t-test was then conducted to  
258 compare relative telomere length between offspring of young and old fathers.

259

260 *RNA sequencing.* RNA was extracted from individual mouse hippocampi or testes with an  
261 RNeasy kit (Qiagen) following the manufacturer's instructions. RNA from hippocampi were  
262 quality controlled by using qPCR to ensure that samples were not contaminated by tissue  
263 from the choroid plexus. Towards this end, RNA was reverse transcribed into cDNA and the  
264 levels of a number of choroid plexus marker genes were assessed using specific TaqMan  
265 probes. The delta delta Ct method with Actb was used to assess relative expression. Next,  
266 we determined quality and quantity of input RNA with a 2100 Bioanalyzer (Agilent  
267 Technologies) using the RNA 6000 Nano or Pico Kit, respectively. Input RNA was then used  
268 to create a next generation sequencing library (Illumina). All libraries were run on an Illumina  
269 HiSeq2000TM (50 bp single end sequencing). After sequencing, adapters were trimmed and  
270 low quality (Phred < 5) bases removed and the results aligned with STAR (21). Per-gene  
271 counts were then generated with featureCounts (22) and statistics computed with DESeq2  
272 (23). All p-values were adjusted for multiple comparisons using the Benjamini and Hochberg  
273 method. We used Ingenuity Pathway Analyses (Qiagen) to identify pathways with significant  
274 enrichment among sets of differentially expressed genes.

275

276 *Small RNA sequencing.* Total RNA from sperm was isolated using TRIzol reagent in  
277 conjunction with the PureLink RNA Mini Kit (Ambion) according to the manufacturer's  
278 instructions. RNA was used to create a next generation sequencing library (TruSeq Stranded  
279 Total RNA with Ribo-Zero Human/Mouse/Rat Library Prep Kit, Illumina). Libraries were then  
280 run on an Illumina HiSeq2000TM. The small RNA-seq data was analyzed using Oasis 2 (24)  
281 (Rahman *et al.*, Bioinformatics, *in revision*). For differential expression we used the 'DE

282 analysis' module of Oasis, considering small RNAs significantly differentially expressed when  
283 their adjusted p-value was smaller than 0.05. Potential targets of differentially expressed  
284 miRNAs were annotated using the experimentally validated microRNA-target interaction  
285 database – miRTarBase (25).

286

287 *Functional analysis of miRNA targets.* We performed enrichment analysis of pathway-based  
288 sets of proteins considering all the validated targets from up- and down-regulated miRNAs.  
289 Enrichment analysis was done employing ConsensusPathDB (26) by using the  
290 'overrepresentation analysis' online tool. As input, we uploaded the 'Gene Symbol' protein  
291 identifiers of each target set. We searched against pathways as defined by KEGG (27), with  
292 a minimal overlap with the input list of 2 and a p-value cutoff of 0.01. Also, employing the  
293 same website and the same analysis tool, we performed an enrichment analysis based on  
294 Gene Ontology (28) level 4 category of biological processes, molecular function and cellular  
295 component. For this analysis, we considered only the identified core proteins and set the p-  
296 value cutoff at 0.01.

297

298 *Repeat element expression analysis.* Samples were adapter and quality trimmed and then  
299 aligned with STAR (21), allowing up to 1000 alignments per read. These alignments were  
300 grouped by read name, allowing them to be processed as a group and subset such that only  
301 alignments with the highest alignment scores in a group were further considered. If any  
302 alignment in the group overlapped with a known exon (Ensembl, release 79) then the entire  
303 group was presumed to have originated from that gene and excluded from further analysis.  
304 For each remaining group, the alignments were tested for overlaps with the UCSC  
305 repeatmasker track for mm10, after chromosome name conversion. If no alignments in a  
306 group overlapped with an annotated repeat then the group was excluded from further  
307 analysis. If all the alignments that overlapped a repeatmasker entry shared the same  
308 repName/repClass/repFamily ID, then the counter for that repName/repClass/repFamily was  
309 incremented. The source code for this procedure is freely available online

310 (<https://github.com/dpryan79/countRepeats>). For repClass and repFamily, approximately 5%  
311 of read groups overlapped more than one ID. For repName, this figure was approximately  
312 20%. Output unique counts were then entered into DESeq2 (23) for further analysis.

313

314 *Reduced representation bisulfite sequencing.* Frozen sperm and hippocampi were briefly  
315 ground in lysis buffer and then DNA extracted with TRIzol (Life Technologies) in phase lock  
316 gel tubes (5 Prime) following the manufacturer's recommendation. After extraction, samples  
317 were run on an agarose gel to ensure sample integrity. Library preparation and sequencing  
318 was performed in collaboration with a specialized service company (Zymo Research).  
319 EpiQuest libraries were prepared from 200-500 ng genomic DNA digested with 60 units of  
320 TaqI and 30 units of MspI (NEB) sequentially. Size-selected TaqI-MspI fragments (40–120 bp  
321 and 120–350 bp) were filled in and 3'-terminal-A extended, extracted with Zymo Research  
322 DNA Clean & Concentrator kit. Ligation to pre-annealed adapters containing 5'-methyl-  
323 cytosine instead of cytosine (Illumina) was performed using the Illumina DNA preparation kit  
324 and protocol. Purified, adaptor ligated fragments were bisulphite-treated using the EZ DNA  
325 Methylation-Direct Kit (Zymo Research). Preparative-scale PCR was performed and DNA  
326 Clean & Concentrator-purified PCR products were subjected to a final size selection on a 4%  
327 NuSieve 3:1 agarose gel. SYBR-green-stained gel slices containing adaptor-ligated  
328 fragments of 130-210 bp or 210-460 bp in size were excised. Library material was recovered  
329 from the gel (Zymoclean Gel DNA Recovery Kit, Zymo Research) and sequenced on an  
330 Illumina HiSeq 2000. After sequencing, adapters and low quality bases were trimmed from  
331 reads before mapping against the mouse genome with Bison (29). Before extraction of per-C  
332 methylation metrics, methylation bias plots were constructed and regions showing biased  
333 methylation conversion from both ends of each read were excluded from further use.  
334 Methylation counts were then loaded into R and a paired-weighted T-test, where weights  
335 were the minimum of the coverage of the groups, used to calculate the statistics of each  
336 region of interest. All p-values were adjusted for multiple comparisons using the Benjamini  
337 and Hochberg method. Differentially methylated promoters were defined as promoters

338 (distance to TSS between -5 kb and +1 kb) overlapping with a 2-kb differentially methylated  
339 region. Assessment of the significance of dataset overlap between F0 and F1 differentially  
340 methylated regions was performed based on exact hypergeometric probability. We used  
341 Ingenuity Pathway Analyses (Qiagen) to identify pathways with significant enrichment among  
342 sets of genes with differentially methylated promoters.

343

344 *Targeted bisulfite sequencing.* Sperm DNA was extracted using the Quick-DNA Microprep  
345 Plus Kit (Zymo Research) according to the manufacturer's instructions with the following  
346 modifications. In brief, sperm pellets were resuspended in up to 50  $\mu$ l PBS and homogenized  
347 in the presence of 50  $\mu$ l BioFluid & Cell Buffer (Red). Samples were incubated for 1 h at  
348 55°C and 450 rpm with 5  $\mu$ l Proteinase K, followed by a second incubation step (1 h, 55°C,  
349 450 rpm) after the addition of 10  $\mu$ l 0.5 M Bond-Breaker TCEP Solution (Thermo Fisher  
350 Scientific). Digested samples were mixed with 115  $\mu$ l Genomic Binding Buffer and transferred  
351 to a Zymo-Spin IC-XM Column. Washing was performed according to the protocol (Zymo  
352 Research) and pure DNA was eluted in DNase-free water. Targeted DNA methylation  
353 analyses were then carried out in collaboration with a specialized service company (Zymo  
354 Research). Assays were designed targeting CpG sites within the specified regions of interest  
355 upstream of and overlapping with *Gm7120* (chr13: 120276057-120277892; mm9 coordinates)  
356 using primers generated with Rosefinch, Zymo Research's proprietary sodium bisulfite  
357 converted DNA-specific primer design tool. Information on primers used is provided in a  
358 separate document (Supplementary\_Material\_Targeted\_BS-Seq\_Primers.xlsx). All primers  
359 were resuspended or ordered in TE solution at 100  $\mu$ M. Primers were then mixed (if  
360 necessary) and diluted to 2  $\mu$ M each. All primers were tested using Real-Time PCR with 1 ng  
361 of bisulfite-converted control DNA, in duplicate individual reactions. Following primer  
362 validation, samples were bisulfite converted using the EZ DNA Methylation-Lightning Kit  
363 (Zymo Research, catalog no. D5030) according to the manufacturer's instructions. Multiplex  
364 amplification of all samples using region of interest-specific primer pairs and the Fluidigm  
365 Access Array System was performed following the manufacturer's instructions. The resulting

366 amplicons were pooled for harvesting and subsequent barcoding according to the Fluidigm  
367 instrument's guidelines. After barcoding, samples were purified (ZR-96 DNA Clean &  
368 Concentrator, Zymo Research, catalog no. D4023) and then prepared for massively parallel  
369 sequencing using a MiSeq V2 300bp Reagent Kit and paired-end sequencing protocol  
370 according to the manufacturer's instructions.

371

372 After sequencing, sequence reads were identified using standard Illumina base-calling  
373 software, followed by analysis with a Zymo Research proprietary analysis pipeline. Low  
374 quality nucleotides and adapter sequences were trimmed off during analysis QC. Sequence  
375 reads were aligned to the reference genome using Bismark (30). The methylation level of  
376 each sampled cytosine was estimated as the number of reads reporting a C, divided by the  
377 total number of reads reporting a C or T. We used two-way ANOVA with the between-  
378 subjects factors age and treatment to compare average methylation ratios in the region of  
379 interest across groups.

380

381 *ChIP sequencing.* Frozen sperm pellets were resuspended in 500  $\mu$ L of somatic cell lysis  
382 buffer (SCLB: 0.1 % SDS, 0.5 % Triton X-100, 50 mM DTT in 10 mM Tris pH 7.5) and  
383 incubated on ice for 20 min. The sperm was pelleted by 3 min of centrifugation at 2,000 g  
384 and quickly washed once in 500  $\mu$ L of Nelson buffer (150 mM NaCl, 20 mM EDTA (pH 8), 50  
385 mM Tris (pH 7.5), 0.5% NP-40, 1% Triton-X-100 and Roche Complete protease inhibitors).  
386 The pellet was then resuspended in 100  $\mu$ L Complete Lysis Buffer (CLB: 15 mM Tris-HCl (pH  
387 7.5), 60 mM KCl, 5 mM MgCl<sub>2</sub>, 0.1 mM EGTA, 0.3 M sucrose and 0.5 mM DTT). The same  
388 volume of Lysis Buffer plus Detergent (CLB with 0.5 % NP40 and 1% sodium deoxycholate)  
389 was added and the mix was incubated on ice for 10 min. One volume of MNase buffer (85  
390 mM Tris (pH 7.5), 3 mM MgCl<sub>2</sub>, 2 mM CaCl<sub>2</sub>, 0.3 M sucrose) with MNase (NEB M0247S,  
391 final 1/2000) was added and the mix was incubated for 15 min at 37°C with 800 rpm shaking.  
392 The reaction was stopped on ice by adding EDTA to 5 mM. Protease inhibitors (Roche) were  
393 added as well as 120 mM NaCl, 1% NP-40 and 0.1% SDS. The chromatin was pre-cleared

394 with 20  $\mu$ L of BSA-blocked Protein A Dynabeads (Life Technologies) for 1 h at 4°C. The rest  
395 of the ChIP protocol was previously published (31). We used 0.5  $\mu$ g H3K4me3 antibody  
396 (Abcam ab8580, lot number GR126420-2) and 0.5  $\mu$ g H3K27me3 (Abcam ab6002).

397

398 In order to determine the best ChIP conditions for sperm, modifications of this protocol were  
399 tested: The frozen sperm pellets were resuspended in PBS and fixed by 1% formaldehyde  
400 (Sigma) for 5 min. The reaction was quenched by adding glycine to 125 mM. The pellets  
401 were washed in 500  $\mu$ L of Nelson buffer and sheared either by sonication or by MNase  
402 digestion (as above). For the sonication, the pellets were resuspended in 100  $\mu$ L of RIPA  
403 (140 mM NaCl, 1 mM EDTA, 1% TritonX-100, 0.1% sodium deoxycholate, 10 mM Tris-Cl (pH  
404 8.0), 1% SDS and protease inhibitors), incubated for 10 min at 4°C and sheared in a  
405 Bioruptor Plus (Diagenode) for 20 cycles, 30 s ON/OFF. The chromatin was cleared by  
406 centrifugation at 16,000 g for 5 min at 4°C and diluted in IP buffer (31). The comparison of  
407 the different sperm ChIP protocols showed that the native ChIP protocol using MNase  
408 digestion on unfixed chromatin yielded the best results (**Fig. S2**). The ChIP-seq libraries  
409 were prepared using Digenode Microplex kit as previously described (31).

410

411 ChIP-seq data was first subjected to quality control as described previously obtaining high-  
412 quality uniquely and multi-mapped reads (31). Peaks and differentially occupied regions were  
413 detected as previously described (31). In brief, MACSv2.0.10 (32) was used to compare  
414 ChIP-seq signal to a corresponding whole-cell extract sequenced control (input) to identify  
415 narrow regions of enrichment (peaks) that pass a Poisson adjusted p-value threshold of 0.05.  
416 Fragment lengths for each data set were pre-estimated using the in-house R package  
417 'chequeR' and these fragment length estimates were explicitly used as parameters in the  
418 MACS2 program (`--shift-size = fragment_length/2`).

419

420 To have a common set of peaks for each histone modification, all the replicates were  
421 concatenated and merged using bedtools mergeBed (33). Significant changes between

422 peaks in old and young father sperm histone modifications were assessed with DESeq2 (23).  
423 For differential histone post-translational modifications, only peak regions with an adjusted p-  
424 value < 0.05 were annotated and considered for further analysis.

425

426 *Data deposition.* Next-generation sequencing datasets have been deposited to ENA under  
427 the study accession number PRJEB23859.

428

429

## 430 **References**

431

- 432 1. Neff F, *et al.* (2013) Rapamycin extends murine lifespan but has limited effects on aging. *J Clin Invest*  
433 123(8):3272-3291.
- 434 2. Zhang S, *et al.* (2011) Constitutive reductions in mTOR alter cell size, immune cell development, and  
435 antibody production. *Blood* 117(4):1228-1238.
- 436 3. Auroux MR, *et al.* (1989) Paternal age and mental functions of progeny in man. *Hum Reprod* 4(7):794-  
437 797.
- 438 4. Malaspina D, *et al.* (2005) Paternal age and intelligence: implications for age-related genomic changes  
439 in male germ cells. *Psychiatr Genet* 15(2):117-125.
- 440 5. Saha S, *et al.* (2009) Advanced paternal age is associated with impaired neurocognitive outcomes  
441 during infancy and childhood. *PLoS Med* 6(3):e40.
- 442 6. Auroux M (1983) Decrease of learning capacity in offspring with increasing paternal age in the rat.  
443 *Teratology* 27(2):141-148.
- 444 7. Garcia-Palomares S, *et al.* (2009) Long-term effects of delayed fatherhood in mice on postnatal  
445 development and behavioral traits of offspring. *Biol Reprod* 80(2):337-342.
- 446 8. Malaspina D, Gilman C, & Kranz TM (2015) Paternal age and mental health of offspring. *Fertil Steril*  
447 103(6):1392-1396.
- 448 9. Smith RG, *et al.* (2009) Advancing paternal age is associated with deficits in social and exploratory  
449 behaviors in the offspring: a mouse model. *PLoS One* 4(12):e8456.
- 450 10. Guibert S, Forne T, & Weber M (2012) Global profiling of DNA methylation erasure in mouse  
451 primordial germ cells. *Genome Res* 22(4):633-641.
- 452 11. Kobayashi H, *et al.* (2013) High-resolution DNA methylome analysis of primordial germ cells  
453 identifies gender-specific reprogramming in mice. *Genome Res* 23(4):616-627.
- 454 12. Matynia A, *et al.* (2008) A high through-put reverse genetic screen identifies two genes involved in  
455 remote memory in mice. *PLoS One* 3(5):e2121.
- 456 13. Heinen M, *et al.* (2012) Adult-onset fluoxetine treatment does not improve behavioral impairments and  
457 may have adverse effects on the Ts65Dn mouse model of Down syndrome. *Neural Plast* 2012:467251.
- 458 14. Burgess A, *et al.* (2010) Loss of human Greatwall results in G2 arrest and multiple mitotic defects due  
459 to deregulation of the cyclin B-Cdc2/PP2A balance. *Proc Natl Acad Sci U S A* 107(28):12564-12569.
- 460 15. Onda H, Lueck A, Marks PW, Warren HB, & Kwiatkowski DJ (1999) Tsc2(+/-) mice develop tumors  
461 in multiple sites that express gelsolin and are influenced by genetic background. *J Clin Invest*  
462 104(6):687-695.
- 463 16. Sanz E, *et al.* (2009) Cell-type-specific isolation of ribosome-associated mRNA from complex tissues.  
464 *Proc Natl Acad Sci U S A* 106(33):13939-13944.
- 465 17. Tsien JZ, Huerta PT, & Tonegawa S (1996) The essential role of hippocampal CA1 NMDA receptor-  
466 dependent synaptic plasticity in spatial memory. *Cell* 87(7):1327-1338.
- 467 18. DePristo MA, *et al.* (2011) A framework for variation discovery and genotyping using next-generation  
468 DNA sequencing data. *Nat Genet* 43(5):491-498.
- 469 19. Callicott RJ & Womack JE (2006) Real-time PCR assay for measurement of mouse telomeres. *Comp*  
470 *Med* 56(1):17-22.
- 471 20. Cawthon RM (2002) Telomere measurement by quantitative PCR. *Nucleic Acids Res* 30(10):e47.



472 21. Dobin A, *et al.* (2013) STAR: ultrafast universal RNA-seq aligner. *Bioinformatics* 29(1):15-21.

473 22. Liao Y, Smyth GK, & Shi W (2014) featureCounts: an efficient general purpose program for assigning  
474 sequence reads to genomic features. *Bioinformatics* 30(7):923-930.

475 23. Love MI, Huber W, & Anders S (2014) Moderated estimation of fold change and dispersion for RNA-  
476 seq data with DESeq2. *Genome Biol* 15(12):550.

477 24. Capece V, *et al.* (2015) Oasis: online analysis of small RNA deep sequencing data. *Bioinformatics*  
478 31(13):2205-2207.

479 25. Chou CH, *et al.* (2016) miRTarBase 2016: updates to the experimentally validated miRNA-target  
480 interactions database. *Nucleic Acids Res* 44(D1):D239-247.

481 26. Kamburov A, Stelzl U, Lehrach H, & Herwig R (2013) The ConsensusPathDB interaction database:  
482 2013 update. *Nucleic Acids Res* 41(Database issue):D793-800.

483 27. Kanehisa M & Goto S (2000) KEGG: kyoto encyclopedia of genes and genomes. *Nucleic Acids Res*  
484 28(1):27-30.

485 28. Ashburner M, *et al.* (2000) Gene ontology: tool for the unification of biology. The Gene Ontology  
486 Consortium. *Nat Genet* 25(1):25-29.

487 29. Ryan DP & Ehninger D (2014) Bison: bisulfite alignment on nodes of a cluster. *BMC Bioinformatics*  
488 15:337.

489 30. Krueger F & Andrews SR (2011) Bismark: a flexible aligner and methylation caller for Bisulfite-Seq  
490 applications. *Bioinformatics* 27(11):1571-1572.

491 31. Halder R, *et al.* (2016) DNA methylation changes in plasticity genes accompany the formation and  
492 maintenance of memory. *Nat Neurosci* 19(1):102-110.

493 32. Zhang Y, *et al.* (2008) Model-based analysis of ChIP-Seq (MACS). *Genome Biol* 9(9):R137.

494 33. Quinlan AR & Hall IM (2010) BEDTools: a flexible suite of utilities for comparing genomic features.  
495 *Bioinformatics* 26(6):841-842.

496

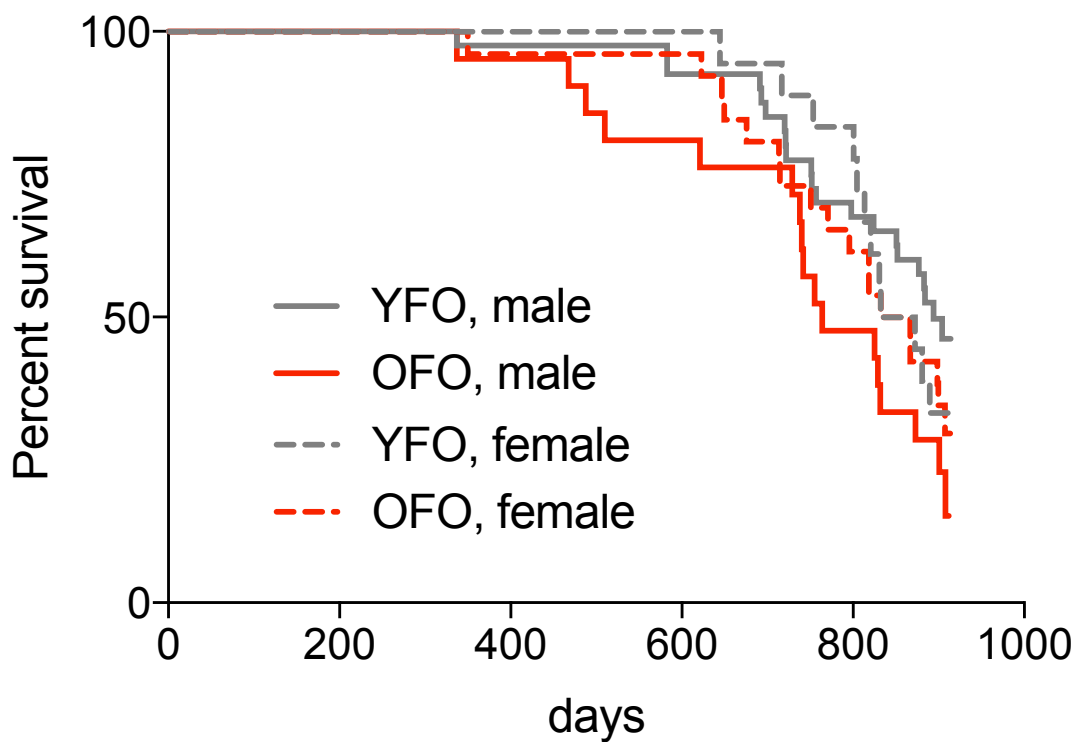

**Fig. S1: Lifespan data analyzed by paternal age and sex.** The figure shows the lifespan data presented in Fig. 1 stratified by sex (YFO male,  $n = 40$  mice; OFO male,  $n = 21$  mice; YFO female,  $n = 18$  mice; OFO female,  $n = 26$  mice). Cox proportional hazards regression revealed a significant effect of paternal age ( $P = 0.018$ ), no measurable effect of sex ( $P = 0.47$ ), as well as no paternal age x sex interaction ( $P = 0.20$ ).

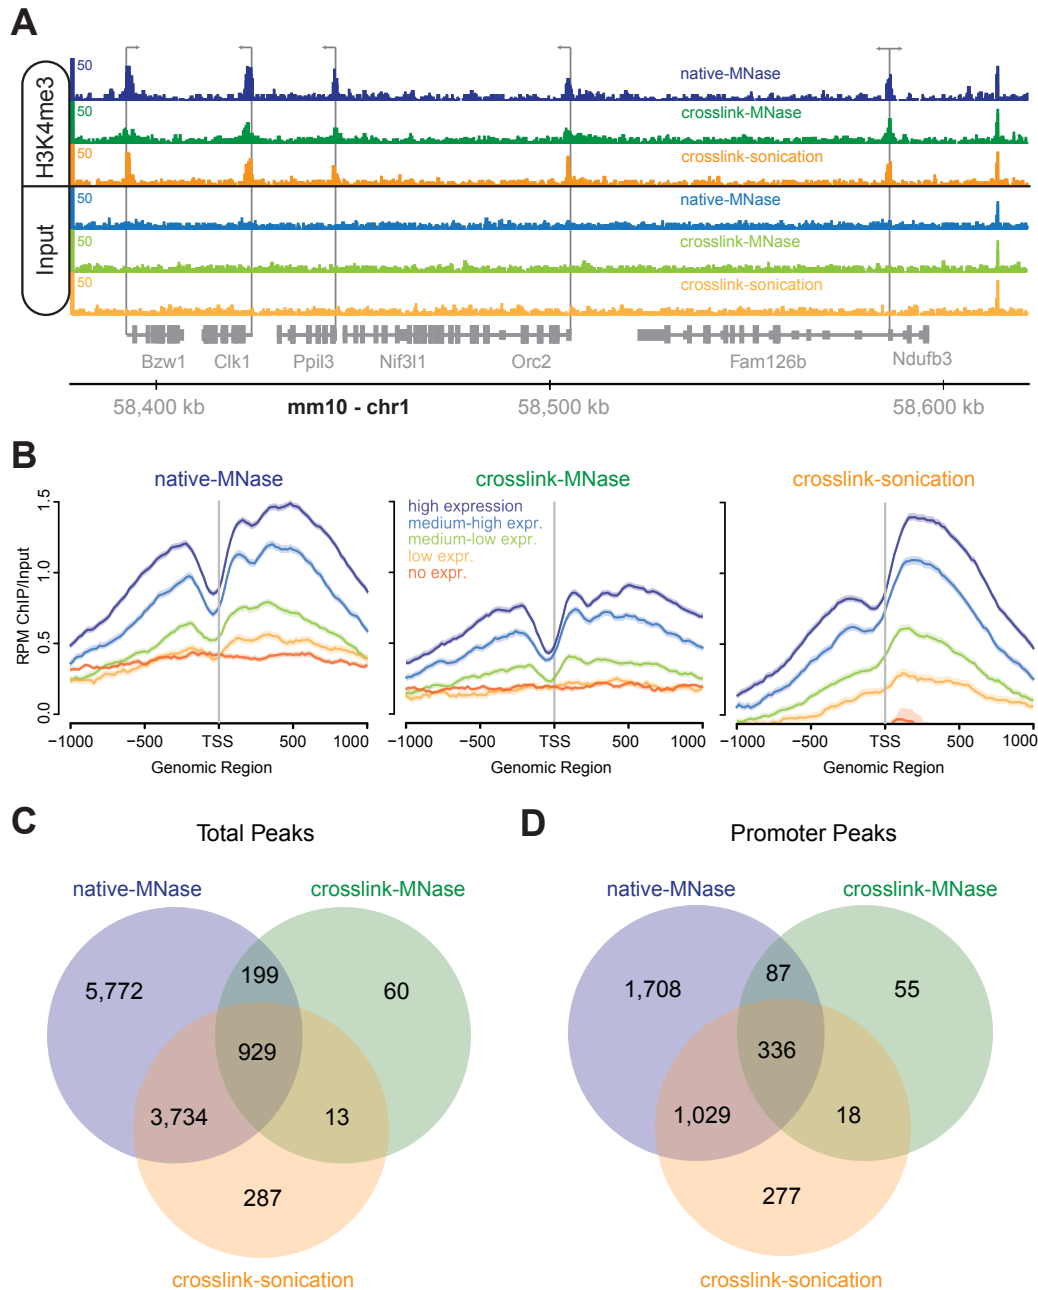

**Fig. S2: Sperm ChIP-seq optimization.** To obtain reliable information on chromatin modification changes in the sperm of old and young fathers, we first optimized the ChIP chromatin extraction protocol. We have used three different chromatin extraction protocols (see Material and Methods). In the first protocol, native chromatin was fragmented using MNase digestion (native-MNase), yielding large amounts of evenly fragmented, unfixed chromatin. A second, widely used protocol first fixes and subsequently fragments the chromatin using sonication (crosslink-sonication) that results in smaller amounts of fixed and therefore stabilized chromatin with higher size-variability. The third chromatin extraction protocol we tested fixed the chromatin and subsequently fragmented it using MNase (crosslink-MNase), yielding smaller amounts of fixed, evenly fragmented chromatin. To obtain quality information for the different protocols we performed H3K4me3 ChIP-seq experiments with the different chromatin extractions and compared the results to input chromatin. All experiments were conducted with two technical replicates. **(A)** Overall, all chromatin extraction protocols yielded H3K4me3 peaks at active gene promoters in sperm when compared to input. The crosslink-MNase protocol resulted in a notable reduction in peak size compared to the other two protocols. Transcriptional start sites of genes are denoted by arrows and genes within a 200 kb region of mouse chromosome 1 (mm10) are shown. **(B)** Aggregate H3K4me3 promoter occupancy plots for genes that are grouped into five distinct RNA expression classes (high to no expression). Aggregate gene plots for the three different chromatin extraction protocols showed strong enrichment for highly expressed genes and little enrichment for genes expressed at low levels or not expressed at all. As also shown in **(A)**, H3K4me3 peak enrichment appeared to be reduced in the crosslink-MNase protocol. **(C, D)** Comparison of the common and distinct H3K4me3 total **(C)**, as well as promoter **(D)** peaks for the three extraction protocols. Comparing all significant peaks, the native-MNase protocol detects most, the crosslink-MNase protocols the least amount of peaks, and most of the peaks of the crosslink-MNase and crosslink-sonication protocols are shared with the native-MNase protocol. When sub-setting the peak list to annotated gene promoters a general three fold reduction in peak numbers can be observed. In summary, we decided to use the native-MNase extraction protocol for all further experiments since it yielded the largest number for high-quality H3K4me3 peaks that correlated well with active gene expression.

| Upstream Regulators           | P value of overlap | Molecule Type                   | Predicted Activation |
|-------------------------------|--------------------|---------------------------------|----------------------|
| lipopolysaccharide            | 3.58E-18           | chemical drug                   | Activated            |
| TNF                           | 4.94E-14           | cytokine                        |                      |
| tretinoin                     | 1.30E-13           | chemical - endogenous mammalian | Activated            |
| IFNG                          | 2.75E-13           | cytokine                        | Activated            |
| IGF1                          | 3.37E-13           | growth factor                   |                      |
| IL6                           | 6.62E-12           | cytokine                        |                      |
| STAT3                         | 4.00E-11           | transcription regulator         |                      |
| TGFB1                         | 1.10E-10           | growth factor                   |                      |
| CTNMB1                        | 1.63E-10           | transcription regulator         | Activated            |
| beta-estradiol                | 1.89E-09           | chemical - endogenous mammalian |                      |
| E. coli B4 lipopolysaccharide | 2.74E-09           | chemical toxicant               |                      |
| dexamethasone                 | 3.26E-09           | chemical drug                   |                      |
| IL1B                          | 3.30E-09           | cytokine                        |                      |
| WNT3A                         | 5.64E-09           | cytokine                        |                      |
| phorbol myristate acetate     | 6.21E-09           | chemical drug                   |                      |
| TCF7L2                        | 7.93E-09           | transcription regulator         | Inhibited            |
| EGR1                          | 9.08E-09           | transcription regulator         | Activated            |
| SB203580                      | 9.74E-09           | chemical - kinase inhibitor     | Inhibited            |
| IL13                          | 1.79E-08           | cytokine                        |                      |
| mifepristone                  | 2.27E-08           | chemical drug                   |                      |
| IKBKB                         | 3.01E-08           | kinase                          | Activated            |
| PD98059                       | 4.52E-08           | chemical - kinase inhibitor     |                      |
| poly rI:rC-RNA                | 6.11E-08           | biologic drug                   | Activated            |
| lfnar                         | 7.28E-08           | group                           |                      |
| LEP                           | 1.12E-07           | growth factor                   |                      |

| Top Causal Networks | P value  | Predicted activation |
|---------------------|----------|----------------------|
| HECW1               | 2.52E-18 |                      |
| MIRLET7             | 6.19E-18 |                      |
| GATA3               | 1.70E-17 | Inhibited            |
| Smad1/5/8-Smad4     | 8.76E-17 |                      |
| TREM2               | 1.73E-16 | Activated            |

| Top Diseases and Disorders          | P value             |
|-------------------------------------|---------------------|
| Inflammatory Response               | 5.63E-04 - 1.21E-11 |
| Cancer                              | 7.38E-04 - 8.87E-10 |
| Organismal Injury and Abnormalities | 7.38E-04 - 8.87E-10 |
| Reproductive System Disease         | 5.04E-04 - 8.87E-10 |
| Endocrine System Disorders          | 5.63E-04 - 1.58E-08 |

| Top Molecular and Cellular Functions   | P value             |
|----------------------------------------|---------------------|
| Cellular Movement                      | 6.38E-04 - 2.00E-15 |
| Cell-To-Cell Signaling and Interaction | 7.47E-04 - 8.08E-11 |
| Cell Morphology                        | 6.87E-04 - 3.58E-10 |
| Cellular Development                   | 6.95E-04 - 8.61E-10 |
| Cellular Growth and Proliferation      | 6.95E-04 - 8.61E-10 |

| Top Physiological System Development and Function | P value             |
|---------------------------------------------------|---------------------|
| Immune Cell Trafficking                           | 5.43E-04 - 3.50E-14 |
| Tissue Morphology                                 | 7.10E-04 - 2.07E-13 |
| Hematological System Development and Function     | 6.46E-04 - 9.28E-13 |
| Embryonic Development                             | 6.87E-04 - 7.54E-09 |
| Organismal Development                            | 7.40E-04 - 7.54E-09 |

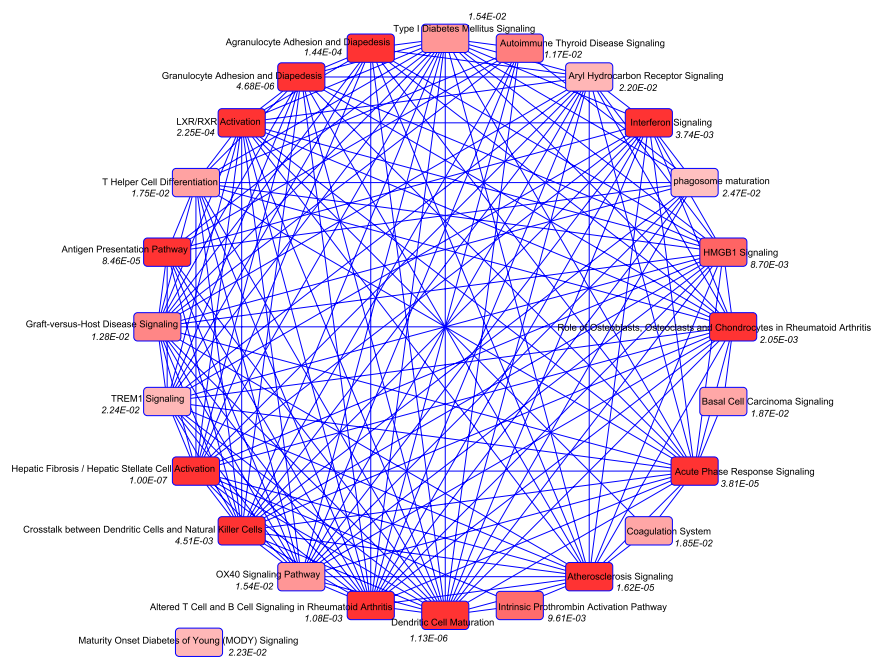

**Fig. S3: Differentially expressed genes in old father offspring tissue were enriched for immune and inflammatory regulators.** The figure shows the results of a broader pathway analysis of 720 genes ( $P < 0.05$ ) identified in our RNA-seq study comparing old father offspring and young father offspring transcriptomes. The tables identify upstream regulators predicted to regulate genes within this gene set ( $P$  values indicate significance of overlap; shown is also the predicted activation state of the regulator with its gene set), top causal networks predicted to regulate these genes, top diseases and disorders, top molecular and cellular functions, as well as top physiological system development processes and functions with significant enrichment in this gene set ( $P$  values refer to  $P$  value ranges, minimal to maximal, of sub-items within the respective category). The image shows canonical pathways with significant enrichment ( $P$  values are shown).

| Upstream Regulators | P value of overlap | Molecule Type                   | Predicted Activation |
|---------------------|--------------------|---------------------------------|----------------------|
| DYSF                | 4.18E-18           | other                           |                      |
| IFNG                | 5.44E-15           | cytokine                        | Activated            |
| lfnar               | 1.48E-13           | group                           | Activated            |
| lipopolysaccharide  | 2.36E-13           | chemical drug                   | Activated            |
| TRIM24              | 3.58E-13           | transcription regulator         | Inhibited            |
| poly rI:rC-RNA      | 2.73E-11           | biologic drug                   | Activated            |
| IRF7                | 3.66E-11           | transcription regulator         | Activated            |
| IFNA2               | 3.81E-11           | cytokine                        | Activated            |
| APP                 | 1.22E-10           | other                           | Activated            |
| STAT1               | 1.39E-10           | transcription regulator         | Activated            |
| methylprednisolone  | 2.08E-10           | chemical drug                   |                      |
| tretinoin           | 4.27E-09           | chemical - endogenous mammalian | Activated            |
| TNF                 | 1.14E-08           | cytokine                        | Activated            |
| TGFB1               | 1.79E-08           | growth factor                   |                      |
| IL1B                | 1.95E-08           | cytokine                        | Activated            |
| IL4                 | 2.43E-08           | cytokine                        | Activated            |
| KRAS                | 4.47E-08           | enzyme                          |                      |
| IFN alpha/beta      | 4.93E-08           | group                           | Activated            |
| mir-21              | 6.56E-08           | microrna                        | Inhibited            |
| cholesterol         | 6.99E-08           | chemical - endogenous mammalian |                      |
| TP53                | 7.78E-08           | transcription regulator         | Activated            |
| Interferon alpha    | 1.46E-07           | group                           | Activated            |
| IFNB1               | 2.57E-07           | cytokine                        | Activated            |
| IRF3                | 3.31E-07           | transcription regulator         | Activated            |
| PTGER4              | 4.83E-07           | g-protein coupled receptor      | Inhibited            |

| Top Causal Networks    | P value  | Predicted activation |
|------------------------|----------|----------------------|
| IFNGR2                 | 5.73E-22 | Activated            |
| LIFR                   | 7.88E-20 |                      |
| CRLF1                  | 8.06E-20 | Activated            |
| CLC                    | 8.57E-20 | Activated            |
| lfnz (includes others) | 1.04E-18 | Activated            |

| Top Diseases and Disorders | P value             |
|----------------------------|---------------------|
| Endocrine System Disorders | 2.25E-04 - 2.42E-13 |
| Gastrointestinal Disease   | 1.88E-03 - 2.42E-13 |
| Immunological Disease      | 2.03E-03 - 2.42E-13 |
| Metabolic Disease          | 2.25E-04 - 2.42E-13 |
| Cancer                     | 1.88E-03 - 1.93E-12 |

| Top Molecular and Cellular Functions | P value             |
|--------------------------------------|---------------------|
| Cellular Growth and Proliferation    | 7.79E-04 - 1.85E-11 |
| Cell Death and Survival              | 2.03E-03 - 8.03E-11 |
| Cellular Function and Maintenance    | 1.94E-03 - 6.87E-10 |
| Cellular Movement                    | 1.99E-03 - 8.91E-10 |
| Cell Morphology                      | 1.92E-03 - 1.47E-09 |

| Top Physiological System Development and Function | P value             |
|---------------------------------------------------|---------------------|
| Organismal Survival                               | 2.13E-04 - 7.04E-14 |
| Hematological System Development and Function     | 1.99E-03 - 1.43E-09 |
| Tissue Morphology                                 | 1.63E-03 - 1.43E-09 |
| Immune Cell Trafficking                           | 1.99E-03 - 1.89E-07 |
| Organismal Development                            | 1.83E-03 - 4.21E-07 |

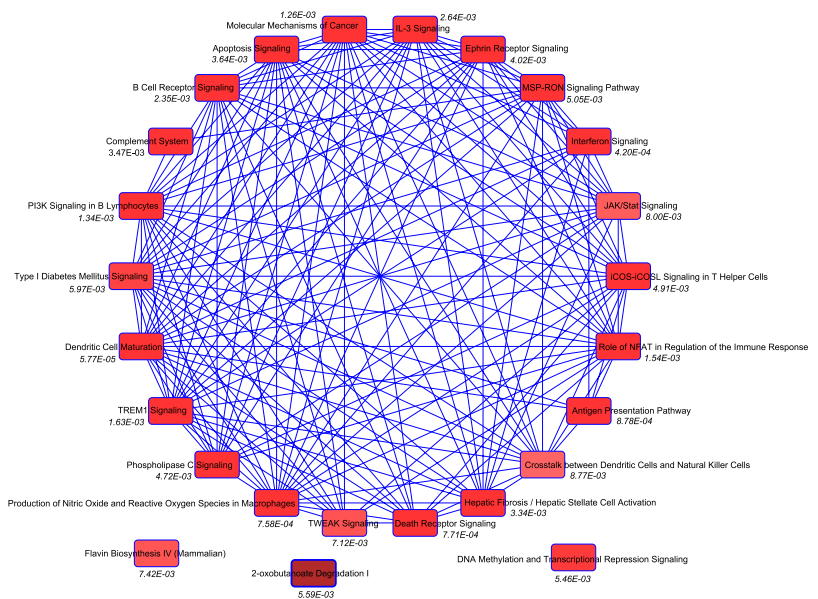

**Fig. S4: Differentially expressed genes in aged testis were enriched for immune and inflammatory regulators.** The figure shows the results of a pathway analysis of 1,985 genes ( $P < 0.05$ ) identified in our RNA-seq study comparing transcriptomes across young and aged testes. The tables identify upstream regulators predicted to regulate genes within this gene set ( $P$  values indicate significance of overlap; shown is also the predicted activation state of the regulator with its gene set), top causal networks predicted to regulate these genes, top diseases and disorders, top molecular and cellular functions, as well as top physiological system development processes and functions with significant enrichment in this gene set ( $P$  values refer to  $P$  value ranges, minimal to maximal, of sub-items within the respective category). The image shows canonical pathways with significant enrichment ( $P$  values are shown).

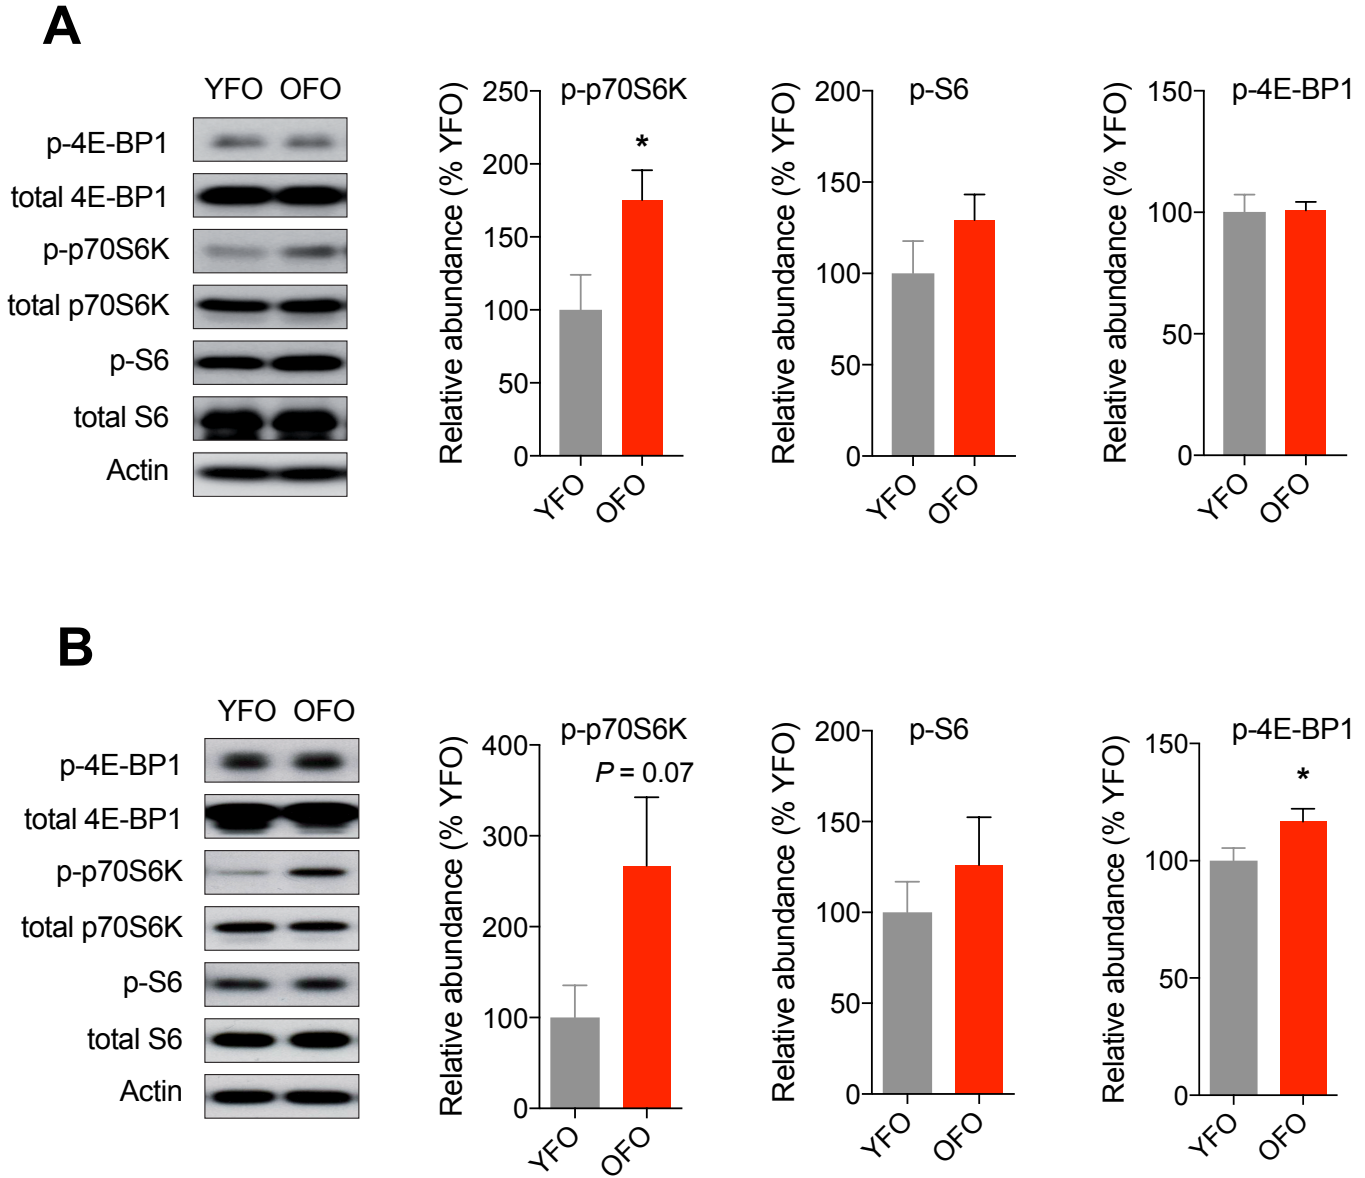

**Fig. S5: Western blot experiments provided evidence for an increased mTORC1 activation state in peripheral tissues.** (A) Lung. (B) Liver. Bar graphs show the phosphorylation status (i.e., phospho-protein normalized to total protein) of the mTORC1 downstream effectors p70S6K at Thr389 (lung: YFO,  $n = 6$  mice from 6 litters; OFO,  $n = 5$  mice from 5 litters; liver:  $n = 6$  mice from 6 litters per group), ribosomal protein S6 at Ser240/244 (lung and liver, respectively:  $n = 6$  mice from 6 litters per group), and 4E-BP1 at Thr37/46 (lung:  $n = 6$  mice from 6 litters per group; liver:  $n = 12$  mice from 12 litters per group). Graphs show mean  $\pm$  SEM. \*  $P < 0.05$ .

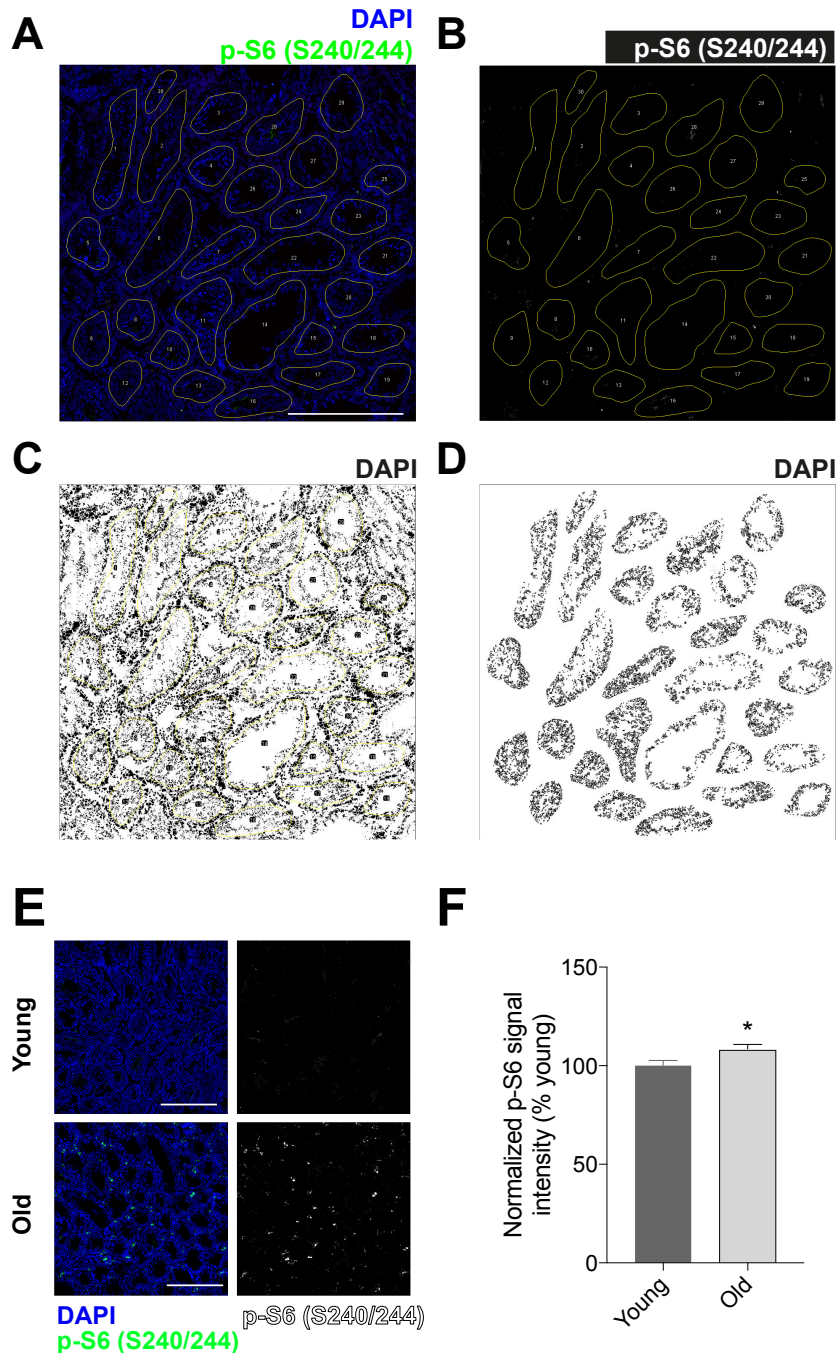

**Fig. S6: Analysis of phosphorylated S6 signal in germ cells with fluorescence intensity analysis.** Histology-based fluorescence intensity analyses were carried out to assess the phosphorylation of ribosomal protein S6 at Ser240/244 within spermatogenic cell lineages in testis derived from young (3 months old) and old (20 months old) C57BL/6J Rj mice. Tile scan Z stack maximum intensity projections were collected from immunolabeled testis sections (12  $\mu\text{m}$  thick) by collecting a 6 x 6 array of 1024 x 1024 resolution confocal images (Zeiss LSM 700). **(A)** ROIs of the seminiferous tubules were made by a researcher blind to experimental condition in stitched mosaic images leaving the basal spermatogonia layer excluded from the ROI. **(B)** Then total corrected fluorescence intensity was measured from all ROIs in the p-S6 channel (488 wavelength) using the corrected total cell fluorescence method (ref. 14), taking into account background fluorescence. **(C)** Because the number of cells contained in the seminiferous tubules could bias the average intensity results, we calculated the average cell number per tubule by using the auto threshold in FIJI (ImageJ, NIH) and then applying the waterfall binary correction to differentiate profiles that contact each other, and then **(D)** obtaining a DAPI profile count only inside of the previously generated ROIs. The background corrected fluorescence was then normalized to the average cell number per tubule for that image. **(E)** Representative images of young and old testis sections. **(F)** Normalized p-S6 signals from young ( $n = 537$  seminiferous tubules from  $n = 4$  mice) and old ( $n = 335$  seminiferous tubules from  $n = 4$  mice) seminiferous tubules. \* denotes  $P < 0.05$ . All scale bars equal 500  $\mu\text{m}$ .

| Upstream Regulators           | P value of overlap | Molecule Type                   | Predicted Activation |
|-------------------------------|--------------------|---------------------------------|----------------------|
| IFNG                          | 1.94E-53           | cytokine                        | Inhibited            |
| lipopolysaccharide            | 6.30E-49           | chemical drug                   | Inhibited            |
| E. coli B4 lipopolysaccharide | 1.02E-42           | chemical toxicant               | Inhibited            |
| Ifnar                         | 1.64E-36           | group                           |                      |
| IRF7                          | 3.40E-30           | transcription regulator         | Activated            |
| IL6                           | 1.62E-29           | cytokine                        | Inhibited            |
| IL1B                          | 1.64E-29           | cytokine                        | Inhibited            |
| TNF                           | 2.91E-29           | cytokine                        | Inhibited            |
| tretinoin                     | 7.54E-28           | chemical - endogenous mammalian | Inhibited            |
| IRF3                          | 1.29E-27           | transcription regulator         | Activated            |
| Interferon alpha              | 1.74E-27           | group                           |                      |
| STAT1                         | 3.05E-26           | transcription regulator         |                      |
| TRIM24                        | 8.57E-26           | transcription regulator         |                      |
| poly rI:rC-RNA                | 1.10E-25           | biologic drug                   |                      |
| STAT3                         | 1.35E-25           | transcription regulator         | Inhibited            |
| IL4                           | 4.77E-23           | cytokine                        | Inhibited            |
| inosine                       | 1.16E-22           | chemical - endogenous mammalian | Inhibited            |
| IL10                          | 3.41E-22           | cytokine                        |                      |
| SPI1                          | 4.69E-22           | transcription regulator         | Inhibited            |
| IFNB1                         | 1.07E-21           | cytokine                        |                      |
| IFNAR1                        | 6.39E-21           | transmembrane receptor          |                      |
| IFNA2                         | 7.86E-21           | cytokine                        |                      |
| IL21                          | 8.33E-21           | cytokine                        |                      |
| DNASE2                        | 2.23E-20           | enzyme                          |                      |
| TGFB1                         | 6.96E-20           | growth factor                   | Inhibited            |

| Top Causal Networks          | P value  | Predicted activation |
|------------------------------|----------|----------------------|
| GATA3                        | 3.67E-53 | Activated            |
| IFNG                         | 1.34E-51 | Inhibited            |
| lipopolysaccharide           | 2.08E-44 | Inhibited            |
| E.coli B4 lipopolysaccharide | 6.84E-42 | Inhibited            |
| UBE3C                        | 2.16E-38 |                      |

| Top Diseases and Disorders | P value             |
|----------------------------|---------------------|
| Endocrine System Disorders | 3.01E-07 - 3.55E-45 |
| Gastrointestinal Disease   | 2.26E-07 - 3.55E-45 |
| Immunological Disease      | 3.79E-07 - 3.55E-45 |
| Metabolic Disease          | 2.99E-09 - 3.55E-45 |
| Inflammatory Response      | 3.44E-07 - 5.23E-44 |

| Top Molecular and Cellular Functions   | P value             |
|----------------------------------------|---------------------|
| Cell-To-Cell Signaling and Interaction | 3.86E-07 - 4.91E-52 |
| Cellular Function and Maintenance      | 4.52E-07 - 5.25E-42 |
| Cellular Movement                      | 4.66E-07 - 9.06E-40 |
| Cellular Development                   | 3.26E-07 - 1.85E-32 |
| Cellular Growth and Proliferation      | 2.49E-07 - 1.85E-32 |

| Top Physiological System Development and Function | P value             |
|---------------------------------------------------|---------------------|
| Hematological System Development and Function     | 4.66E-07 - 5.66E-44 |
| Immune Cell Trafficking                           | 4.66E-07 - 5.66E-44 |
| Tissue Morphology                                 | 3.79E-07 - 8.35E-32 |
| Humoral Immune Response                           | 3.48E-08 - 1.31E-23 |
| Tissue Development                                | 3.44E-07 - 2.72E-23 |

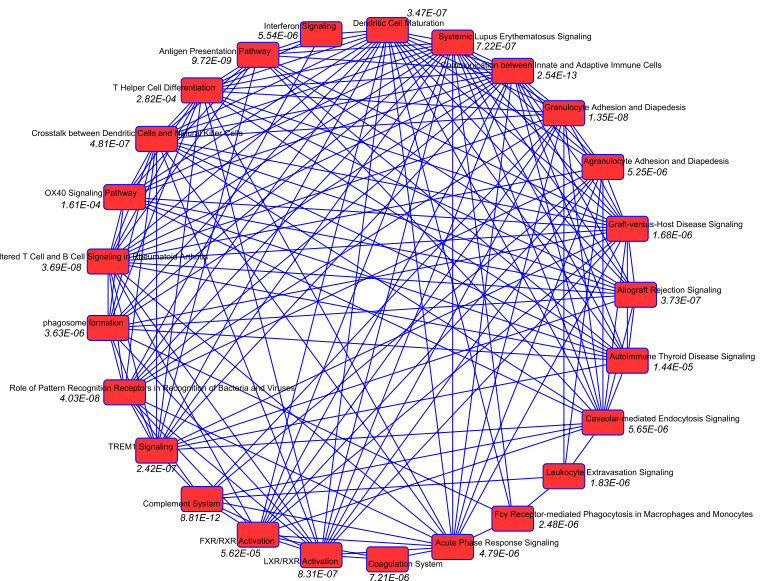

**Fig. S7: Rapamycin counteracted immune- and inflammation-related transcriptional changes associated with aging.** The figure shows the results of an Ingenuity pathway analysis focusing on a gene set differentially expressed in aged (~24 months,  $n = 2$  mice) vs. young (~4 months,  $n = 2$  mice) hippocampus ( $n = 402$  genes;  $FDR < 0.1$ ), as revealed by an RNA-seq analysis of young vs. old rapamycin or vehicle control-treated animals. Mean expression changes induced by rapamycin treatment in this gene set were used for the analysis. The tables identify upstream regulators predicted to regulate these genes ( $P$  values indicate significance of overlap; shown is also the predicted activation state of the regulator with its gene set), top causal networks predicted to regulate this set of genes, top diseases and disorders, top molecular and cellular functions, as well as top physiological system development processes and functions with significant enrichment among this set of differentially expressed genes ( $P$  values refer to  $P$  value ranges, minimal to maximal, of sub-items within the respective category). The image shows canonical pathways with significant enrichment ( $P$  values are shown).



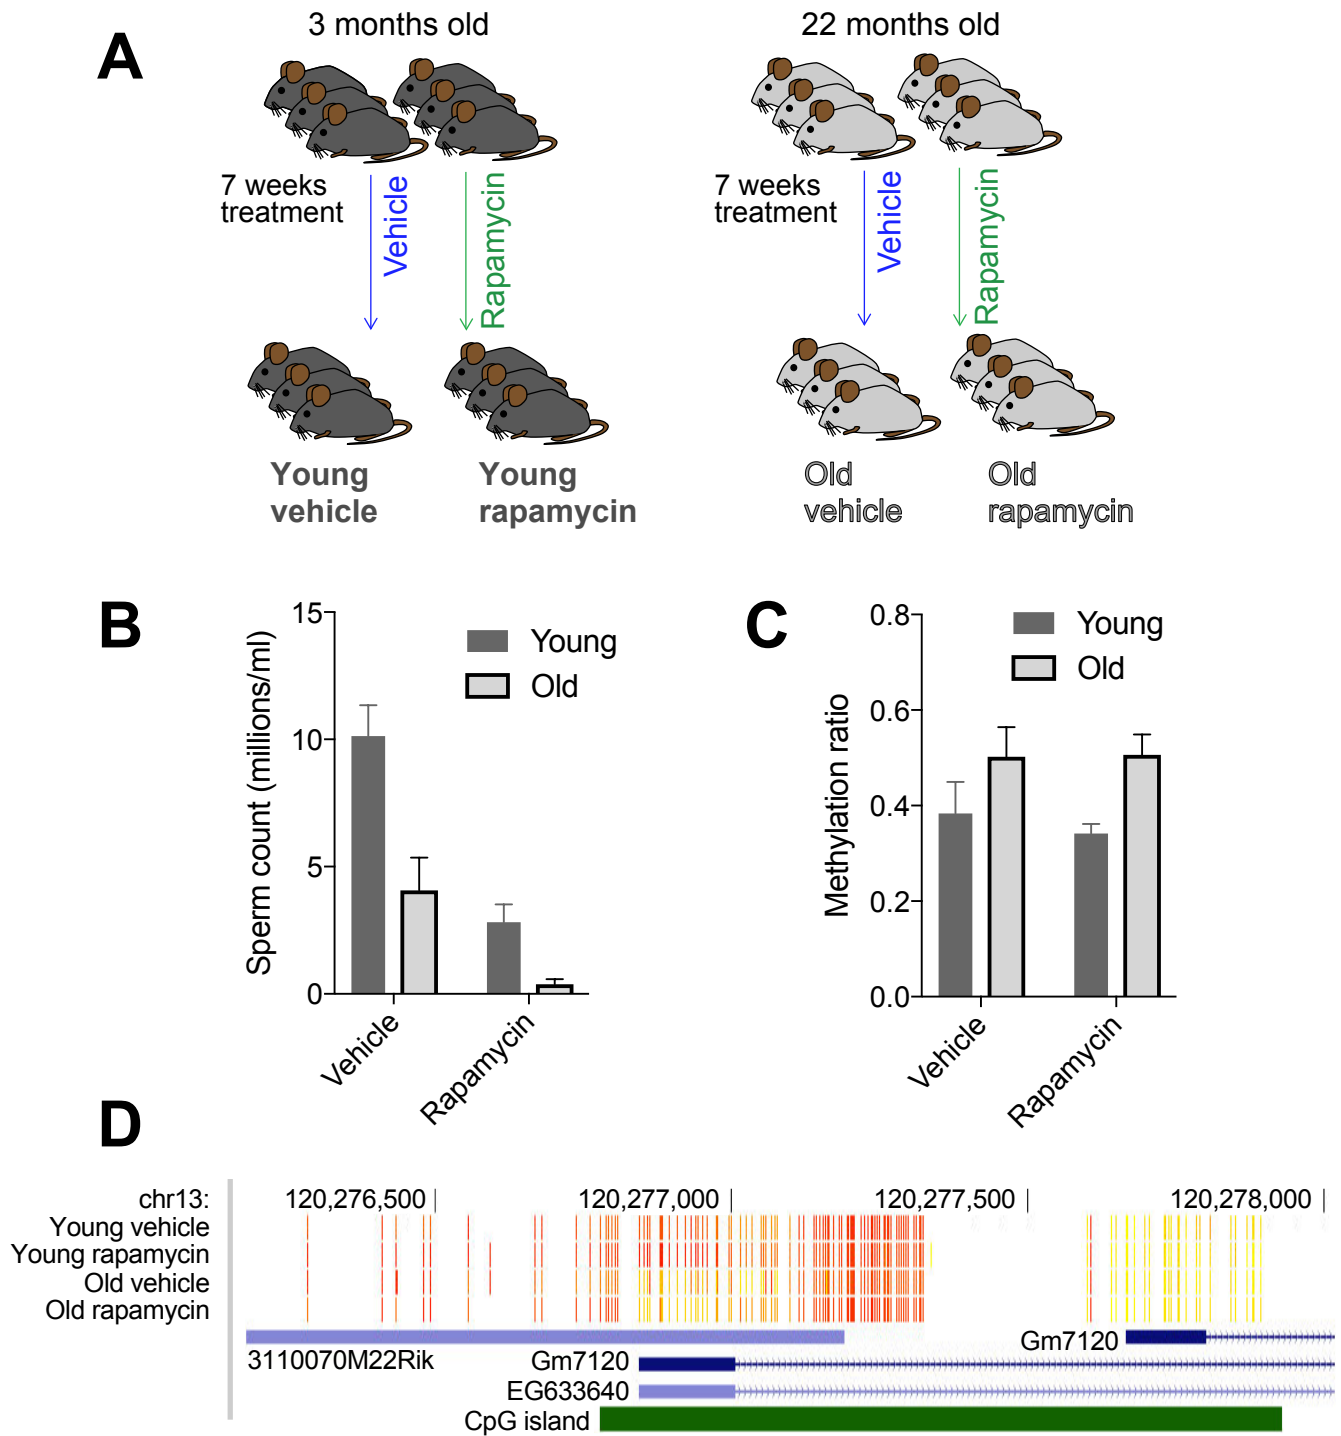

**Fig. S8: A 7-weeks rapamycin treatment regimen did not modify altered DNA methylation in sperm of aged mice.** (A) The schematic illustrates experimental design. (B) Sperm counts in epididymal swim out of young and old mice subjected to rapamycin or vehicle control (young/vehicle, young/rapamycin, old/rapamycin:  $n = 9$  mice per group; old/vehicle:  $n = 5$  mice). Rapamycin substantially decreased sperm counts across age groups (two-way ANOVA with the between-subjects factors age and treatment: effect of age,  $P < 0.0001$ ; effect of treatment,  $P < 0.0001$ ; age x treatment interaction,  $P = 0.06$ ). (C, D) CpG methylation, examined by targeted bisulfite sequencing, of a genomic area upstream of and overlapping with *Gm7120* (chr13: 120276057-120277892; young/vehicle, young/rapamycin, old/vehicle:  $n = 5$  mice per group; old/rapamycin:  $n = 4$  mice). The expected aging-associated hypermethylation in this genomic area in sperm was not modified by rapamycin in any obvious way (C, shown are average CpG methylation ratios across this region; two-way ANOVA with the between-subjects factors age and treatment: effect of age,  $P = 0.02$ ; effect of treatment,  $P = 0.71$ ; age x treatment interaction,  $P = 0.67$ ). (D) Representative CpG methylation tracks across this genomic area. Yellow denotes high methylation ratios, red indicates low methylation levels. Graphs show mean  $\pm$  SEM.

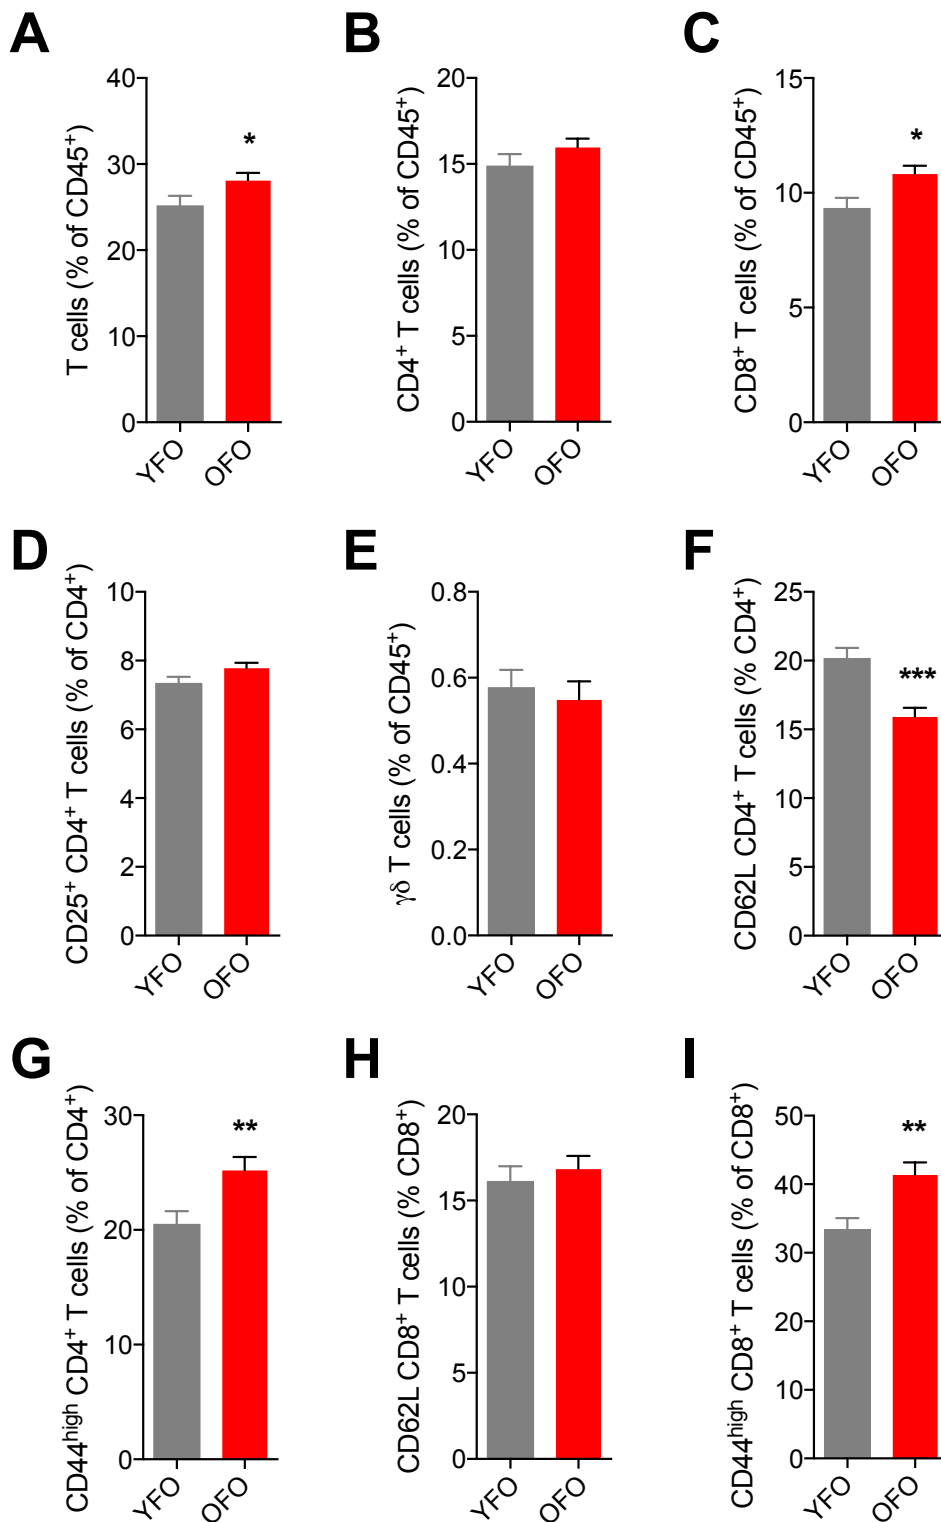

**Fig. S9: Increased abundance of CD44<sup>high</sup>-expressing T cells in old father offspring mice.** Results of FACS-based quantification of peripheral blood leukocytes in young and old father offspring mice (YFO,  $n = 27$  mice from 11 litters; OFO  $n = 29$  mice from 10 litters). (A) T cells; (B) CD4<sup>+</sup> T cells; (C) CD8<sup>+</sup> T cells; (D) CD25<sup>+</sup> CD4<sup>+</sup> T cells; (E)  $\gamma\delta$  T cells; (F) CD62L-expressing CD4<sup>+</sup> T cells; (G) CD44<sup>high</sup>-expressing CD4<sup>+</sup> T cells; (H) CD62L-expressing CD8<sup>+</sup> T cells; (I) CD44<sup>high</sup>-expressing CD8<sup>+</sup> T cells. Graphs show mean  $\pm$  SEM. \*  $P < 0.05$ ; \*\*  $P < 0.01$ ; \*\*\*  $P < 0.001$ .

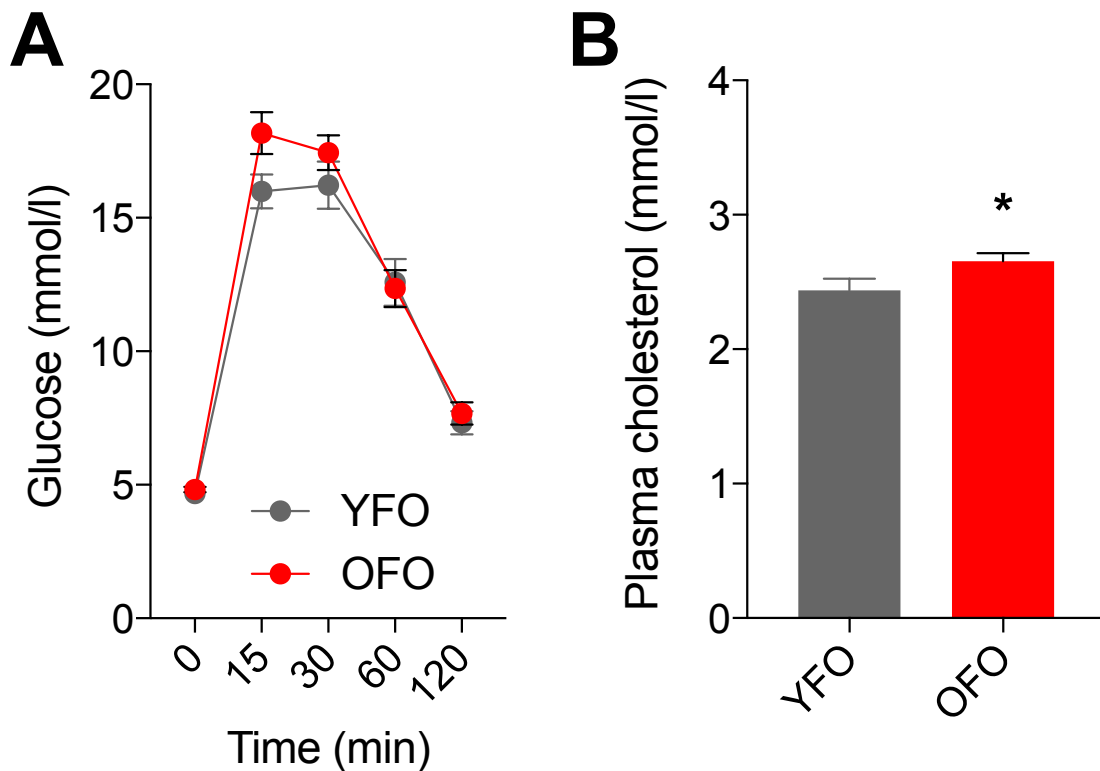

**Fig. S10: Metabolic changes in old father offspring mice.** (A) Plasma glucose concentrations during an intraperitoneal glucose tolerance test in young and old father offspring mice (approx. 6 months old; YFO,  $n = 27$  mice from 11 litters; OFO,  $n = 29$  mice from 10 litters), where time point “0 min” corresponds to plasma glucose concentrations prior to glucose bolus injection and additional time points refer to plasma glucose levels after intraperitoneal glucose injection. Two-way ANOVA with the between-subjects factor paternal age and the within-subjects factor time point revealed a significant paternal age  $\times$  time interaction ( $P = 0.04$ ; main effect of time point:  $P < 0.0001$ ; main effect of paternal age:  $P = 0.29$ ). (B) Plasma cholesterol concentrations in old and young father offspring mice (approx. 6 months old; YFO,  $n = 27$  mice from 11 litters; OFO,  $n = 29$  mice from 10 litters). Graphs show mean  $\pm$  SEM. \*  $P < 0.05$ .

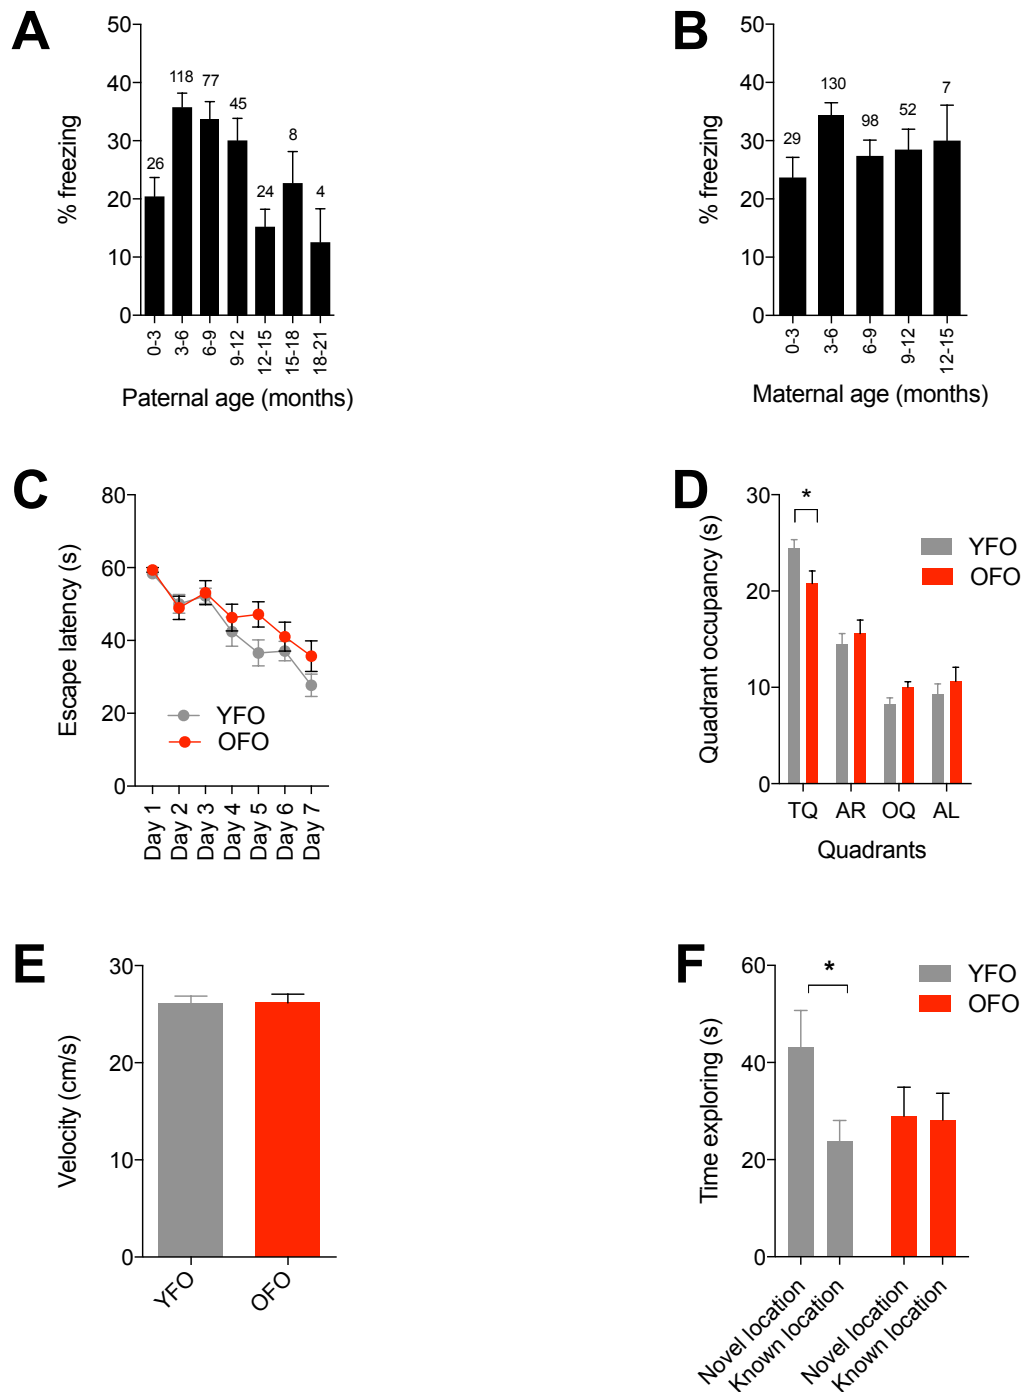

**Fig. S11: Advanced paternal age effects on learning and memory.** (A) Stratification of a large fear conditioning dataset by paternal age revealed an inverted U-shaped relationship of paternal age and freezing behavior in offspring mice (ANOVA, effect of paternal age,  $P = 0.0008$ ). Numbers of animals within each paternal age bin are reported in the figure. (B) Stratification of this fear conditioning dataset by maternal age did not reveal a significant effect of maternal age (ANOVA, effect of maternal age,  $P = 0.14$ ). (C) – (F) Spatial learning in young and old father offspring animals was tested in a hidden version of the Morris water maze ((C) – (E); YFO,  $n = 25$  mice from 10 litters; OFO,  $n = 17$  mice from 7 litters) and in an object-place-recognition paradigm, respectively ((F); YFO,  $n = 16$  mice from 6 litters; OFO,  $n = 14$  mice from 6 litters). (C) Escape latencies during training trials in the Morris water maze (ANOVA, effect of training day,  $P < 0.0001$ ; effect of paternal age,  $P = 0.11$ ; interaction paternal age  $\times$  training day,  $P = 0.40$ ). (D) Quadrant occupancies during probe trial assessment in the Morris water maze (ANOVA, effect of quadrant,  $P < 0.0001$ ; effect of paternal age,  $P = 0.67$ ; interaction paternal age  $\times$  quadrant,  $P = 0.10$ ; planned comparison by unpaired t-test, target occupancy YFO vs. OFO,  $P = 0.02$ ); TQ – target quadrant, AR – adjacent right quadrant, OQ – opposite quadrant, AL – adjacent left quadrant. (E) Swim speed during probe trial assessment did not differ measurably between YFO and OFO mice (unpaired t-test,  $P = 0.96$ ). (F) Testing young and old father offspring animals in an object place recognition learning paradigm showed that exploration times in young father offspring were significantly higher for an object in a novel location than for an object in a known location, while exploration times in old father offspring did not differ between the object in the known location and the object in the novel location (ANOVA, effect of object location,  $P = 0.0064$ ; effect of paternal age,  $P = 0.53$ ; interaction paternal age  $\times$  object location,  $P = 0.01$ ; planned comparison by unpaired t-test, novel location vs. known location: YFO,  $P = 0.03$ ; OFO,  $P = 0.93$ ). Graphs show means  $\pm$  SEM. \* denotes  $P < 0.05$ .

| Chromosome | Start     | End       | Gene Symbol   | UCSC ID    | Distance (bp) | Methylation difference | P value  | FDR      |
|------------|-----------|-----------|---------------|------------|---------------|------------------------|----------|----------|
|            |           |           |               |            |               | to TSS                 |          |          |
| chr1       | 113761495 | 113763495 | Dsel          | uc007chy.1 | 0             | -0.0625                | 0        | 0        |
| chr10      | 23868122  | 23870122  | Stx7          | uc007eqs.1 | 0             | -0.125                 | 0        | 0        |
| chr11      | 11585215  | 11587215  | lkzf1         | uc007iaj.1 | 0             | -0.022869              | 0        | 0        |
| chr11      | 80191517  | 80193517  | 5730455P16Rik | uc007klv.2 | 0             | -0.12                  | 0        | 0        |
| chr13      | 21872423  | 21874423  | Hist1h3h      | uc007prc.1 | 843           | -0.058824              | 0        | 0        |
| chr13      | 21872423  | 21874423  | Hist1h1b      | uc007pri.1 | 0             | -0.058824              | 0        | 0        |
| chr13      | 120275845 | 120277845 | Gm7120        | uc007rzl.1 | 0             | 0.07144                | 0        | 0        |
| chr13      | 120275845 | 120277845 | EG633640      | uc007rzm.1 | 0             | 0.07144                | 0        | 0        |
| chr13      | 120276666 | 120278666 | 3110070M22Rik | uc007rzk.2 | 0             | 0.07067                | 0        | 0        |
| chr13      | 120276666 | 120278666 | Gm7120        | uc007rzl.1 | 0             | 0.07067                | 0        | 0        |
| chr13      | 120276666 | 120278666 | EG633640      | uc007rzm.1 | 0             | 0.07067                | 0        | 0        |
| chr13      | 120277191 | 120279191 | 3110070M22Rik | uc007rzk.2 | 0             | 0.08255                | 0        | 0        |
| chr13      | 120277191 | 120279191 | Gm7120        | uc007rzl.1 | 345           | 0.08255                | 0        | 0        |
| chr13      | 120277191 | 120279191 | EG633640      | uc007rzm.1 | 345           | 0.08255                | 0        | 0        |
| chr13      | 120277191 | 120279191 | 3110070M22Rik | uc007rzk.2 | 0             | 0.08255                | 0        | 0        |
| chr13      | 120277191 | 120279191 | EG633640      | uc007rzm.1 | 345           | 0.08255                | 0        | 0        |
| chr2       | 127657595 | 127659595 | Bub1          | uc008mge.2 | 0             | -0.041667              | 0        | 0        |
| chr2       | 163996849 | 163998849 | Kcns1         | uc008ntv.1 | 0             | 0.051282               | 0        | 0        |
| chr5       | 23536501  | 23538501  | Fam126a       | uc008wqu.1 | -371          | -0.166667              | 0        | 0        |
| chr5       | 137927044 | 137929044 | Epo           | uc009acm.1 | 0             | 0.021277               | 0        | 0        |
| chr5       | 139936488 | 139938488 | 3110082117Rik | uc009agk.1 | 0             | 0.033333               | 0        | 0        |
| chr8       | 4275905   | 4277905   | Timm44        | uc009ktq.2 | 0             | -0.138889              | 0        | 0        |
| chr8       | 108375908 | 108377908 | Cenpt         | uc009nef.1 | 0             | -0.033333              | 0        | 0        |
| chrX       | 50973585  | 50975585  | Cxx1a         | uc009tfe.2 | 0             | 0.037037               | 0        | 0        |
| chrX       | 70458703  | 70460703  | Xlr4b         | uc009tlj.1 | 0             | 0.142857               | 0        | 0        |
| chrX       | 86004892  | 86006892  | Mir1906-1     | uc012hlo.1 | 0             | 0.1                    | 0        | 0        |
| chrX       | 132162244 | 132164244 | Prame         | uc012hos.1 | 0             | 0.181818               | 0        | 0        |
| chrX       | 156576268 | 156578268 | Pdha1         | uc009utc.1 | 0             | 0.090909               | 0        | 0        |
| chr16      | 31947631  | 31949631  | 0610012G03Rik | uc007yxy.2 | 0             | -0.016665              | 0        | 0.000002 |
| chr16      | 31947631  | 31949631  | Ncbp2         | uc007yxz.2 | 0             | -0.016665              | 0        | 0.000002 |
| chr10      | 12809593  | 12811593  | Plagl1        | uc011xag.1 | 0             | 0.030228               | 0        | 0.000008 |
| chr10      | 12809593  | 12811593  | Zac1          | uc007ekn.1 | 0             | 0.030228               | 0        | 0.000008 |
| chr3       | 40602872  | 40604872  | Plk4          | uc008pbm.1 | 0             | -0.041758              | 0        | 0.000071 |
| chr1       | 120207709 | 120209709 | Tsn           | uc007cib.1 | 0             | 0.033468               | 0        | 0.000075 |
| chr11      | 87429665  | 87431665  | Hsf5          | uc007kuc.1 | 0             | 0.04402                | 0        | 0.000121 |
| chr2       | 69484311  | 69486311  | Bbs5          | uc008jyf.1 | 0             | -0.077077              | 0        | 0.000121 |
| chr19      | 38128514  | 38130514  | AK153534      | uc008hiw.1 | 0             | -0.039873              | 0        | 0.000176 |
| chr19      | 38128514  | 38130514  | Cep55         | uc008hix.2 | 0             | -0.039873              | 0        | 0.000176 |
| chr19      | 38128531  | 38130531  | AK153534      | uc008hiw.1 | 0             | -0.039873              | 0        | 0.000176 |
| chr19      | 38128531  | 38130531  | Cep55         | uc008hix.2 | 0             | -0.039873              | 0        | 0.000176 |
| chr5       | 145305755 | 145307755 | Nptx2         | uc012egq.1 | 0             | 0.024269               | 0        | 0.00021  |
| chr5       | 72950884  | 72952884  | Nfxl1         | uc008xrl.1 | 0             | -0.066512              | 0.000001 | 0.000383 |
| chr10      | 110942341 | 110944341 | Phlda1        | uc007haf.2 | 0             | -0.029212              | 0.000001 | 0.000413 |
| chr4       | 88418897  | 88420897  | Gm13285       | uc008tnn.2 | 0             | 0.068046               | 0.000001 | 0.000413 |
| chr1       | 36592574  | 36594574  | Ankrd23       | uc007aql.1 | 0             | -0.026657              | 0.000001 | 0.000476 |
| chr4       | 88429957  | 88431957  | Gm13285       | uc008tnn.2 | -1924         | 0.096686               | 0.000001 | 0.000603 |
| chr4       | 88429957  | 88431957  | Gm13276       | uc008tnq.2 | 0             | 0.096686               | 0.000001 | 0.000603 |
| chr17      | 35959301  | 35961301  | ler3          | uc008cio.1 | 643           | -0.060355              | 0.000002 | 0.000674 |
| chr17      | 35959301  | 35961301  | Flot1         | uc008cip.1 | 0             | -0.060355              | 0.000002 | 0.000674 |
| chr5       | 110714337 | 110716337 | Pxmp2         | uc008yqj.1 | 0             | -0.018705              | 0.000002 | 0.000675 |

**Table S1: Reduced representation bisulfite sequencing (RRBS) revealed a broad set of differentially methylated promoters in old sperm.** RRBS analyses of sperm from young (4 months old) vs. aged (24 months old) mice (pooling equimolar amounts of DNA of  $n = 5$  mice per group) identified promoters differentially methylated in sperm as a consequence of aging. The table shows the top of the list of genes with differentially methylated promoters. Shown are genomic coordinates, gene IDs, methylation differences (old – young),  $P$  values and false discovery rates (FDR).

| Upstream Regulators                          | P value of overlap | Molecule Type                     | Predicted Activation |
|----------------------------------------------|--------------------|-----------------------------------|----------------------|
| TP53                                         | 3.44E-12           | transcription regulator           |                      |
| RAD21                                        | 5.91E-10           | transcription regulator           |                      |
| CTCF                                         | 9.54E-08           | transcription regulator           |                      |
| CDKN1A                                       | 1.19E-07           | kinase                            |                      |
| FOS                                          | 1.54E-07           | transcription regulator           |                      |
| HNF4A                                        | 1.80E-07           | transcription regulator           |                      |
| MYC                                          | 2.12E-07           | transcription regulator           |                      |
| beta-estradiol                               | 6.52E-07           | chemical - endogenous mammalian   |                      |
| tretinoin                                    | 8.09E-07           | chemical - endogenous mammalian   | Activated            |
| trichostatin A                               | 1.53E-06           | chemical drug                     | Activated            |
| 5-azacytidine                                | 2.84E-06           | chemical drug                     | Activated            |
| CTNNA1                                       | 3.26E-06           | transcription regulator           |                      |
| L-dopa                                       | 6.42E-06           | chemical - endogenous mammalian   |                      |
| TGFB1                                        | 9.27E-06           | growth factor                     |                      |
| HTT                                          | 1.18E-05           | transcription regulator           |                      |
| MYCN                                         | 1.40E-05           | transcription regulator           |                      |
| miR-26a-5p (and other miRNAs w/seed UCAAGUA) | 1.49E-05           | mature microRNA                   |                      |
| ESR1                                         | 1.65E-05           | ligand-dependent nuclear receptor |                      |
| gentamicin                                   | 1.92E-05           | chemical drug                     |                      |
| IGF1                                         | 2.27E-05           | growth factor                     |                      |
| miR-124-3p (and other miRNAs w/seed AAGGCAC) | 2.85E-05           | mature microRNA                   |                      |
| GnRH analog                                  | 3.95E-05           | biologic drug                     |                      |
| UCN-01                                       | 4.42E-05           | chemical drug                     |                      |
| ELAVL1                                       | 5.45E-05           | other                             |                      |
| NRG1                                         | 7.16E-05           | growth factor                     |                      |

| Top Causal Networks | P value  | Predicted activation |
|---------------------|----------|----------------------|
| EP300               | 3.25E-12 |                      |
| MAPK12              | 1.60E-11 |                      |
| BUB3                | 4.07E-11 |                      |
| SYVN1               | 5.38E-11 |                      |
| RPS6KB1             | 7.22E-11 |                      |

| Top Diseases and Disorders          | P value             |
|-------------------------------------|---------------------|
| Cancer                              | 1.14E-02 - 8.62E-19 |
| Organismal Injury and Abnormalities | 1.15E-02 - 8.62E-19 |
| Gastrointestinal Disease            | 9.65E-03 - 3.60E-17 |
| Reproductive System Disease         | 1.14E-02 - 2.64E-11 |
| Developmental Disorder              | 1.01E-02 - 2.64E-11 |

| Top Molecular and Cellular Functions | P value             |
|--------------------------------------|---------------------|
| Gene Expression                      | 4.06E-03 - 4.32E-15 |
| Cellular Growth and Proliferation    | 4.31E-03 - 7.85E-10 |
| Cellular Development                 | 4.14E-03 - 5.40E-09 |
| Cell Death and Survival              | 4.14E-03 - 4.54E-08 |
| Cell Morphology                      | 4.40E-03 - 9.72E-08 |

**Table S2: Pathways, regulators and processes enriched in the gene set with differentially methylated promoters in aged sperm.** The tables show the results of a pathway analysis focusing on the gene set with differentially methylated promoters in old father offspring tissue ( $P < 0.05$ ). They identify upstream regulators predicted to regulate genes with differentially methylated promoters ( $P$  values indicate significance of overlap; shown is also the predicted activation state of the regulator with its gene set), top causal networks predicted to regulate genes with differentially methylated promoters, top diseases and disorders, top molecular and cellular functions, as well as top physiological system development processes and functions with significant enrichment among differentially methylated promoters in aged sperm ( $P$  values refer to  $P$  value ranges, minimal to maximal, of sub-items within the respective category).

| Diseases and Biological Functions           | F0 sperm      | F1 hippocampus |
|---------------------------------------------|---------------|----------------|
|                                             | old vs. Young | OFO vs. YFO    |
| organismal death                            | -4.89         | -8.35          |
| perinatal death                             | -1.64         | -4.28          |
| organization of cytoskeleton                | 1.48          | 3.69           |
| organization of cytoplasm                   | 1.47          | 3.69           |
| microtubule dynamics                        | 1.63          | 3.74           |
| proliferation of cells                      | 1.67          | 3.27           |
| proliferation of tumor cell lines           | 1.20          | 2.02           |
| Growth Failure                              | -1.38         | -3.73          |
| size of embryo                              | 1.16          | 3.94           |
| cell viability                              | 0.62          | 3.74           |
| cell survival                               | 0.86          | 3.89           |
| Hypoplasia                                  | -1.24         | -3.99          |
| formation of cellular protrusions           | 0.47          | 3.61           |
| damage of muscle                            | -2.35         | -1.30          |
| dysgenesis                                  | -1.09         | -3.89          |
| expression of RNA                           | 1.64          | 2.52           |
| neuronal cell death                         | -1.21         | 2.93           |
| hypoplasia of organ                         | -1.19         | -3.59          |
| transcription                               | 1.20          | 2.92           |
| cell viability of tumor cell lines          | 0.85          | 3.01           |
| phosphorylation of protein                  | 1.67          | 2.84           |
| size of body                                | 2.49          | 0.00           |
| apoptosis                                   | -1.50         | -2.23          |
| quantity of cells                           | 1.13          | 2.79           |
| transcription of RNA                        | 1.36          | 2.34           |
| metabolism of protein                       | 1.95          | 0.52           |
| activation of DNA endogenous promoter       | 1.29          | 1.66           |
| transcription of DNA                        | 1.06          | 1.83           |
| development of central nervous system       | 1.96          | 1.94           |
| congenital anomaly of cardiovascular system | 1.01          | -2.88          |
| mass of testis                              | -1.64         | 0.00           |
| incidence of tumor                          | 0.00          | -1.98          |
| dyspnea                                     | 0.00          | -3.53          |
| differentiation of cells                    | -0.32         | 2.72           |
| neonatal death                              | -1.42         | 0.00           |
| tumorigenesis of tissue                     | -1.14         | -0.92          |
| epithelial cancer                           | -1.33         | -0.73          |
| craniofacial abnormality                    | 0.80          | -2.28          |
| malignant solid tumor                       | -1.71         | -0.53          |
| development of neurons                      | 0.26          | 3.02           |
| congenital anomaly of digestive system      | 0.00          | -2.16          |
| differentiation of bone                     | 0.00          | 2.32           |
| development of cardiovascular system        | 0.00          | 3.20           |
| abdominal neoplasm                          | -0.09         | -1.66          |
| abdominal cancer                            | -0.27         | -1.54          |
| congenital anomaly of mouth                 | 0.00          | -2.07          |
| micrognathia                                | 1.32          | -1.84          |
| cell death                                  | -1.71         | -0.81          |
| migration of embryonic cells                | 3.10          | 0.00           |
| quantity of filaments                       | 0.00          | -3.05          |

**Table S3: Ingenuity pathway analyses identified diseases and biological functions associated with genes with differentially methylated promoters in F0 sperm and F1 offspring tissue.** The table shows diseases and biological functions associated with genes with differentially methylated promoters in F0 sperm (young vs. old) and F1 hippocampal tissue (young father offspring vs. old father offspring). Positive z-scores indicate activating effects, while negative z-scores imply inhibitory action on the corresponding biological process. Z-scores >2 or <-2 are considered significant.

| mature          | structure | chromosome | start     | stop      | strand   | log2FoldChange | pvalue   | padj     |
|-----------------|-----------|------------|-----------|-----------|----------|----------------|----------|----------|
| mmu-miR-411-5p  | miRNA     | chr12      | 109710190 | 109710210 | +        | -2.21          | 5.03E-24 | 5.19E-20 |
| mmu-miR-434-5p  | miRNA     | chr12      | 109594528 | 109594549 | +        | -2.04          | 2.07E-17 | 1.07E-13 |
| mmu_piR_039057  | piRNA     | Multiple   | Multiple  | Multiple  | Multiple | -1.63          | 2.07E-15 | 5.34E-12 |
| mmu-miR-410-3p  | miRNA     | chr12      | 109743764 | 109743784 | +        | -2.01          | 2.03E-15 | 5.34E-12 |
| mmu-miR-541-5p  | miRNA     | chr12      | 109742422 | 109742446 | +        | -1.42          | 8.06E-15 | 1.66E-11 |
| mmu-miR-127-3p  | miRNA     | chr12      | 109592888 | 109592909 | +        | -1.81          | 1.62E-13 | 2.78E-10 |
| mmu-miR-434-3p  | miRNA     | chr12      | 109594565 | 109594586 | +        | -1.53          | 6.39E-13 | 9.43E-10 |
| mmu-miR-409-3p  | miRNA     | chr12      | 109743204 | 109743225 | +        | -1.86          | 2.72E-12 | 3.50E-09 |
| mmu-miR-431-5p  | miRNA     | chr12      | 109590459 | 109590479 | +        | -2.22          | 5.70E-11 | 6.53E-08 |
| mmu-miR-22-3p   | miRNA     | chr11      | 75463772  | 75463793  | +        | -1.35          | 1.62E-10 | 1.67E-07 |
| mmu-miR-880-3p  | miRNA     | chrX       | 66800540  | 66800561  | -        | -1.84          | 2.14E-10 | 2.01E-07 |
| mmu-miR-463-5p  | miRNA     | chrX       | 66799273  | 66799294  | -        | -1.60          | 2.96E-10 | 2.35E-07 |
| mmu-miR-883a-3p | miRNA     | chrX       | 66780768  | 66780789  | -        | -1.70          | 2.93E-10 | 2.35E-07 |
| mmu-miR-134-5p  | miRNA     | chr12      | 109734145 | 109734166 | +        | -1.80          | 7.13E-10 | 5.25E-07 |
| mmu-miR-465b-5p | miRNA     | chrX       | 66835811  | 66835832  | -        | -1.82          | 8.77E-10 | 6.03E-07 |
| mmu_piR_018780  | piRNA     | Multiple   | Multiple  | Multiple  | Multiple | -1.73          | 1.44E-09 | 7.79E-07 |
| mmu-miR-351-5p  | miRNA     | chrX       | 53053315  | 53053338  | -        | -1.60          | 1.40E-09 | 7.79E-07 |
| mmu-miR-465c-5p | miRNA     | chrX       | 66832566  | 66832587  | -        | -1.60          | 1.39E-09 | 7.79E-07 |
| mmu-miR-181c-5p | miRNA     | chr8       | 84178924  | 84178945  | -        | -1.21          | 1.35E-09 | 7.79E-07 |
| mmu-miR-878-5p  | miRNA     | chrX       | 66801554  | 66801575  | -        | -1.66          | 2.56E-09 | 1.20E-06 |
| mmu-miR-101b-3p | miRNA     | chr19      | 29135338  | 29135356  | +        | -1.62          | 2.56E-09 | 1.20E-06 |
| mmu_piR_016952  | piRNA     | Multiple   | Multiple  | Multiple  | Multiple | -1.43          | 2.47E-09 | 1.20E-06 |
| mmu-miR-743a-3p | miRNA     | chrX       | 66776760  | 66776781  | -        | -1.64          | 3.94E-09 | 1.77E-06 |
| mmu_piR_003570  | piRNA     | Multiple   | Multiple  | Multiple  | Multiple | -1.29          | 4.28E-09 | 1.84E-06 |
| mmu-miR-106b-3p | miRNA     | chr5       | 138165746 | 138165767 | -        | -1.28          | 6.21E-09 | 2.56E-06 |
| mmu-miR-34c-3p  | miRNA     | chr9       | 51103044  | 51103065  | -        | -1.81          | 6.98E-09 | 2.77E-06 |
| mmu-miR-145a-3p | miRNA     | chr18      | 61647827  | 61647848  | -        | -1.34          | 7.41E-09 | 2.83E-06 |
| mmu-miR-872-5p  | miRNA     | chr4       | 94665167  | 94665187  | +        | -1.62          | 8.11E-09 | 2.89E-06 |
| mmu-miR-871-5p  | miRNA     | chrX       | 66810472  | 66810494  | -        | -1.42          | 7.92E-09 | 2.89E-06 |
| mmu-miR-381-3p  | miRNA     | chr12      | 109726870 | 109726891 | +        | -2.05          | 8.66E-09 | 2.98E-06 |
| mmu-miR-19b-3p  | miRNA     | chr14      | 115044358 | 115044380 | +        | -1.83          | 9.56E-09 | 3.18E-06 |
| mmu-miR-881-3p  | miRNA     | chrX       | 66801954  | 66801975  | -        | -1.91          | 1.00E-08 | 3.23E-06 |
| mmu-miR-148b-3p | miRNA     | chr15      | 103285185 | 103285206 | +        | -1.54          | 1.05E-08 | 3.30E-06 |
| mmu_piR_012562  | piRNA     | Multiple   | Multiple  | Multiple  | Multiple | 0.97           | 1.91E-08 | 5.80E-06 |
| mmu-miR-25-3p   | miRNA     | chr5       | 138165332 | 138165353 | -        | -1.40          | 2.46E-08 | 7.24E-06 |
| Snord47         | snoRNA    | chr1       | 161038082 | 161038158 | +        | -1.44          | 2.72E-08 | 7.79E-06 |
| mmu-miR-3963    | miRNA     | chr3       | 151023839 | 151023857 | -        | -1.33          | 3.49E-08 | 9.48E-06 |
| mmu-miR-741-3p  | miRNA     | chrX       | 66796809  | 66796831  | -        | -1.44          | 3.42E-08 | 9.48E-06 |
| mmu-miR-143-3p  | miRNA     | chr18      | 61649199  | 61649219  | -        | -1.44          | 4.92E-08 | 1.30E-05 |
| mmu_piR_002118  | piRNA     | Multiple   | Multiple  | Multiple  | Multiple | -1.18          | 5.15E-08 | 1.33E-05 |
| mmu-miR-337-5p  | miRNA     | chr12      | 109585818 | 109585839 | +        | -2.15          | 5.55E-08 | 1.33E-05 |
| mmu-miR-34b-5p  | miRNA     | chr9       | 51103610  | 51103632  | -        | -1.57          | 5.45E-08 | 1.33E-05 |
| mmu_piR_011982  | piRNA     | Multiple   | Multiple  | Multiple  | Multiple | -1.42          | 5.37E-08 | 1.33E-05 |
| mmu_piR_017770  | piRNA     | Multiple   | Multiple  | Multiple  | Multiple | 0.85           | 5.88E-08 | 1.35E-05 |
| mmu-miR-374b-5p | miRNA     | chrX       | 103573112 | 103573133 | -        | -1.34          | 5.76E-08 | 1.35E-05 |
| mmu-miR-375-3p  | miRNA     | chr1       | 74900661  | 74900682  | -        | -1.27          | 6.76E-08 | 1.48E-05 |
| mmu_piR_005971  | piRNA     | Multiple   | Multiple  | Multiple  | Multiple | -1.25          | 6.75E-08 | 1.48E-05 |
| mmu-miR-331-3p  | miRNA     | chr10      | 93963783  | 93963803  | -        | -1.78          | 8.29E-08 | 1.74E-05 |
| mmu_piR_019332  | piRNA     | Multiple   | Multiple  | Multiple  | Multiple | -2.07          | 8.23E-08 | 1.74E-05 |
| mmu-miR-296-5p  | miRNA     | chr2       | 174267093 | 174267113 | -        | -1.52          | 9.15E-08 | 1.89E-05 |

**Table S4: Differentially expressed sRNAs in aged sperm.** The table shows the top differentially expressed sRNAs in aged sperm (aged: 22 months old,  $n = 3$  mice; young: 3 months old,  $n = 8$  mice).



| Pathway                                                     | Source       | P value  | FDR        |
|-------------------------------------------------------------|--------------|----------|------------|
| Insulin Signaling                                           | Wikipathways | 2.45E-08 | 1.58E-05   |
| IL4-mediated signaling events                               | PID          | 3.81E-08 | 1.58E-05   |
| Regulation of toll-like receptor signaling pathway          | Wikipathways | 6.08E-08 | 1.68E-05   |
| Toll-like receptor signaling pathway                        | Wikipathways | 1.87E-07 | 3.89E-05   |
| Toll-like receptor signaling pathway - Homo sapiens (human) | KEGG         | 2.70E-07 | 4.48E-05   |
| mTOR signaling pathway                                      | PID          | 5.06E-07 | 6.77E-05   |
| Oncostatin M Signaling Pathway                              | Wikipathways | 5.71E-07 | 6.77E-05   |
| il-2 receptor beta chain in t cell activation               | BioCarta     | 9.20E-07 | 9.40E-05   |
| Prolactin                                                   | NetPath      | 1.02E-06 | 9.40E-05   |
| S1P1 pathway                                                | PID          | 1.64E-06 | 0.00012573 |
| Prolactin Signaling Pathway                                 | Wikipathways | 1.93E-06 | 0.00012573 |
| IL-4 Signaling Pathway                                      | Wikipathways | 2.09E-06 | 0.00012573 |

| Pathway                                        | Source       | P value  | FDR      |
|------------------------------------------------|--------------|----------|----------|
| EGFR1                                          | NetPath      | 7.78E-25 | 2.44E-21 |
| Pathways in cancer - Homo sapiens (human)      | KEGG         | 1.52E-23 | 2.38E-20 |
| Developmental Biology                          | Reactome     | 1.49E-20 | 1.56E-17 |
| Proteoglycans in cancer - Homo sapiens (human) | KEGG         | 2.96E-20 | 2.32E-17 |
| Integrated Pancreatic Cancer Pathway           | Wikipathways | 2.26E-18 | 1.42E-15 |
| Axon guidance                                  | Reactome     | 3.47E-17 | 1.81E-14 |
| TGF beta Signaling Pathway                     | Wikipathways | 6.20E-17 | 2.78E-14 |
| EGF-EGFR Signaling Pathway                     | Wikipathways | 1.32E-16 | 5.18E-14 |
| BDNF signaling pathway                         | Wikipathways | 6.72E-16 | 2.24E-13 |
| PDGFR-beta signaling pathway                   | PID          | 7.14E-16 | 2.24E-13 |
| Signalling by NGF                              | Reactome     | 9.48E-16 | 2.71E-13 |
| Colorectal cancer - Homo sapiens (human)       | KEGG         | 4.52E-15 | 1.18E-12 |

**Table S5: High confidence validated targets of miRNAs altered in aged sperm were significantly enriched for signaling pathways, including the mTOR pathway, insulin and growth factor signaling.** The table shows the top significantly enriched pathways among high confidence validated targets of miRNAs altered in aged sperm. The column 'source' indicates which database contains the enriched pathway. Pathway analysis was performed for miRNAs upregulated (top), as well as for miRNAs downregulated in aged sperm (bottom). The mTOR pathway was significantly enriched among targets of both up- and downregulated miRNAs.

| Chr   | Start     | End       | Strand | Annotation                           | Distance to TSS | Gene Name     | Gene Type      |
|-------|-----------|-----------|--------|--------------------------------------|-----------------|---------------|----------------|
| chr11 | 108315846 | 108317452 | +      | intron (NM_011101, intron 2 of 16)   | 27239           | Prkca         | protein-coding |
| chr14 | 69390433  | 69392555  | +      | Intergenic                           | 54343           | Entpd4        | protein-coding |
| chr5  | 15533225  | 15534327  | +      | Intergenic                           | -85323          | Speer4d       | protein-coding |
| chr5  | 15006992  | 15008114  | +      | Intergenic                           | 25454           | Gm17019       | protein-coding |
| chr5  | 15480147  | 15481412  | +      | Intergenic                           | -138320         | Speer4d       | protein-coding |
| chr5  | 14921259  | 14921951  | +      | Intergenic                           | -6716           | Gm9758        | protein-coding |
| chr5  | 15707839  | 15709391  | +      | TTS (NM_001281511)                   | 5656            | Speer4c       | protein-coding |
| chr5  | 15529370  | 15530033  | +      | Intergenic                           | -89398          | Speer4d       | protein-coding |
| chr5  | 17468164  | 17469367  | +      | Intergenic                           | -7357           | Speer4f       | protein-coding |
| chr5  | 14952929  | 14953807  | +      | intron (NR_001584, intron 1 of 3)    | 8074            | Speer8-ps1    | pseudo         |
| chr5  | 15471843  | 15474397  | +      | Intergenic                           | -145979         | Speer4d       | protein-coding |
| chr5  | 14931454  | 14933591  | +      | Intergenic                           | 5953            | Speer4e       | protein-coding |
| chr5  | 15702965  | 15703956  | +      | intron (NR_001585, intron 2 of 4)    | 10811           | Speer4c       | protein-coding |
| chr5  | 14933832  | 14934705  | +      | intron (NM_001122661, intron 4 of 4) | 4207            | Speer4e       | protein-coding |
| chr5  | 14985308  | 14987004  | +      | Intergenic                           | -7257           | Gm10354       | protein-coding |
| chr5  | 14935166  | 14936321  | +      | exon (NM_001122661, exon 3 of 5)     | 2732            | Speer4e       | protein-coding |
| chr5  | 15691978  | 15692817  | +      | intron (NR_001585, intron 1 of 4)    | 11687           | Speer7-ps1    | pseudo         |
| chr5  | 15645958  | 15647031  | +      | Intergenic                           | 10565           | 4930572O03Rik | pseudo         |
| chr5  | 14908044  | 14909993  | +      | Intergenic                           | 5871            | Gm9758        | protein-coding |
| chr5  | 15468061  | 15468760  | +      | Intergenic                           | -150689         | Speer4d       | protein-coding |
| chr5  | 15656813  | 15657836  | +      | promoter-TSS (NR_073011)             | -265            | 4930572O03Rik | pseudo         |
| chr5  | 15612209  | 15612938  | +      | Intergenic                           | -6526           | Speer4d       | protein-coding |
| chr5  | 15461916  | 15463382  | +      | Intergenic                           | -156450         | Speer4d       | protein-coding |
| chr5  | 14910981  | 14912706  | +      | intron (NM_198666, intron 3 of 4)    | 3046            | Gm9758        | protein-coding |
| chr5  | 15030056  | 15030902  | +      | intron (NM_182957, intron 3 of 4)    | 2528            | Gm17019       | protein-coding |
| chr5  | 14978634  | 14979514  | +      | promoter-TSS (NM_001281514)          | -175            | Gm10354       | protein-coding |
| chr5  | 14919467  | 14920164  | +      | Intergenic                           | -4926           | Gm9758        | protein-coding |
| chr5  | 15483068  | 15484798  | +      | Intergenic                           | -135166         | Speer4d       | protein-coding |
| chr5  | 15661254  | 15662025  | +      | Intergenic                           | -4580           | 4930572O03Rik | pseudo         |
| chr5  | 15620258  | 15623504  | +      | intron (NM_025759, intron 3 of 4)    | 2782            | Speer4d       | protein-coding |
| chr5  | 14918167  | 14919372  | +      | Intergenic                           | -3880           | Gm9758        | protein-coding |
| chr5  | 14923325  | 14923966  | +      | Intergenic                           | -8756           | Gm9758        | protein-coding |
| chr5  | 15004600  | 15005436  | +      | Intergenic                           | -26119          | Gm10354       | protein-coding |
| chr5  | 14946800  | 14947492  | +      | intron (NR_001584, intron 1 of 3)    | 1852            | Speer8-ps1    | pseudo         |
| chr5  | 15026911  | 15028590  | +      | Intergenic                           | 5257            | Gm17019       | protein-coding |
| chr5  | 15524608  | 15525296  | +      | Intergenic                           | -94147          | Speer4d       | protein-coding |
| chr5  | 15710193  | 15712138  | +      | intron (NR_001585, intron 4 of 4)    | 3106            | Speer4c       | protein-coding |
| chr5  | 14974737  | 14976920  | +      | intron (NR_001584, intron 3 of 3)    | 3071            | Gm10354       | protein-coding |
| chr5  | 15574571  | 15575556  | +      | Intergenic                           | -44036          | Speer4d       | protein-coding |
| chr5  | 15652178  | 15653068  | +      | non-coding (NR_073011, exon 5 of 5)  | 4436            | 4930572O03Rik | pseudo         |
| chr5  | 15469441  | 15470753  | +      | Intergenic                           | -149002         | Speer4d       | protein-coding |
| chr5  | 15040113  | 15041098  | +      | Intergenic                           | -7598           | Gm17019       | protein-coding |
| chr5  | 15614150  | 15615242  | +      | Intergenic                           | -4403           | Speer4d       | protein-coding |
| chr5  | 14904568  | 14905452  | +      | Intergenic                           | 9879            | Gm9758        | protein-coding |
| chr5  | 15650648  | 15652107  | +      | TTS (NR_073011)                      | 5682            | 4930572O03Rik | pseudo         |
| chr5  | 15579201  | 15582115  | +      | Intergenic                           | -38441          | Speer4d       | protein-coding |
| chr5  | 15624853  | 15625868  | +      | Intergenic                           | 6261            | Speer4d       | protein-coding |
| chr5  | 15653636  | 15655054  | +      | non-coding (NR_073011, exon 3 of 5)  | 2714            | 4930572O03Rik | pseudo         |
| chr7  | 140126017 | 140127240 | +      | exon (NM_153783, exon 2 of 7)        | 943             | Paox          | protein-coding |
| chr7  | 43654939  | 43656003  | +      | intron (NM_031181, intron 6 of 6)    | 4690            | Siglece       | protein-coding |
| chr9  | 121929039 | 121932281 | +      | Intergenic                           | -6615           | 1700048O20Rik | ncRNA          |

**Table S6: ChIP-seq (H3K27me3) identified a hotspot for differentially occupied regions on chromosome 5 in aging sperm.** ChIP-seq (H3K27me3) analyses of sperm from young (3 months old) vs. aged (21-24 months old) mice (young,  $n = 6$  mice; old,  $n = 4$  mice). Annotation of all differential histone post-translational modifications (significant results were obtained for H3K27me3 only; FDR < 0.1). Columns 'Chr', 'Start', 'End' and 'Strand' contain the genomic location of each dhPTM using mm10 genome assembly as reference. The column 'Annotation' shows the genomic structure where the dhPTM is located and other columns are annotations of the closest gene (TSS).

| Chromosome | Start     | End       | Gene Symbol   | UCSC ID    | Distance (bp)<br>to TSS | Methylation difference<br>old-young | P value  | FDR      |
|------------|-----------|-----------|---------------|------------|-------------------------|-------------------------------------|----------|----------|
| chr1       | 168611976 | 168613976 | Fmo9          | uc007dkq.1 | 0                       | 0.166667                            | 0        | 0        |
| chr11      | 82805332  | 82807332  | Slfn9         | uc007kob.1 | 0                       | 0.035714                            | 0        | 0        |
| chr13      | 55884939  | 55886939  | AK019623      | uc007qsa.1 | 0                       | 0.1                                 | 0        | 0        |
| chr13      | 55884939  | 55886939  | Catsper3      | uc007qsb.1 | 0                       | 0.1                                 | 0        | 0        |
| chr13      | 120275845 | 120277845 | Gm7120        | uc007rzl.1 | 0                       | 0.084288                            | 0        | 0        |
| chr13      | 120275845 | 120277845 | EG633640      | uc007rzl.1 | 0                       | 0.084288                            | 0        | 0        |
| chr7       | 14035189  | 14037189  | Bsph1         | uc009ffw.1 | 0                       | -0.0625                             | 0        | 0        |
| chrX       | 7149725   | 7151725   | Ppp1r3f       | uc009slj.1 | 0                       | -0.09805                            | 0        | 0        |
| chrX       | 7149725   | 7151725   | 4930524L23Rik | uc009slk.2 | 0                       | -0.09805                            | 0        | 0        |
| chrX       | 8776098   | 8778098   | Lancl3        | uc009spo.1 | 0                       | -0.086703                           | 0        | 0        |
| chrX       | 19635695  | 19637695  | Chst7         | uc009sss.1 | 0                       | -0.109364                           | 0        | 0        |
| chrX       | 39501588  | 39503588  | Stag2         | uc009taw.1 | 0                       | -0.106489                           | 0        | 0        |
| chrX       | 39501588  | 39503588  | SAP2          | uc009tay.1 | 0                       | -0.106489                           | 0        | 0        |
| chrX       | 39502877  | 39504877  | Stag2         | uc009taw.1 | 288                     | -0.104031                           | 0        | 0        |
| chrX       | 39502877  | 39504877  | SAP2          | uc009tay.1 | 17                      | -0.104031                           | 0        | 0        |
| chrX       | 57657156  | 57659156  | Atp11c        | uc009tib.1 | 0                       | -0.084759                           | 0        | 0        |
| chrX       | 66612505  | 66614505  | Aff2          | uc009tjb.1 | 0                       | -0.116039                           | 0        | 0        |
| chrX       | 70883779  | 70885779  | Dusp9         | uc009tmb.1 | 0                       | -0.1556                             | 0        | 0        |
| chrX       | 97015407  | 97017407  | Tmem28        | uc009tvn.1 | 0                       | -0.097612                           | 0        | 0        |
| chrX       | 147480775 | 147482775 | Fgd1          | uc009uow.1 | 0                       | -0.121859                           | 0        | 0        |
| chrX       | 154481042 | 154483042 | Cnksr2        | uc009ush.1 | 0                       | -0.071266                           | 0        | 0.000001 |
| chrX       | 53983963  | 53985963  | Fhl1          | uc009tgm.1 | 0                       | -0.101397                           | 0        | 0.000015 |
| chrX       | 53984133  | 53986133  | Fhl1          | uc009tgm.1 | 0                       | -0.101397                           | 0        | 0.000015 |
| chr13      | 120276666 | 120278666 | 3110070M22Rik | uc007rzl.2 | 0                       | 0.071017                            | 0        | 0.000051 |
| chr13      | 120276666 | 120278666 | Gm7120        | uc007rzl.1 | 0                       | 0.071017                            | 0        | 0.000051 |
| chr13      | 120276666 | 120278666 | EG633640      | uc007rzl.1 | 0                       | 0.071017                            | 0        | 0.000051 |
| chr12      | 3234790   | 3236790   | 1700012B15Rik | uc007mwj.2 | 0                       | 0.05584                             | 0        | 0.000077 |
| chrX       | 68616934  | 68618934  | Mtmr1         | uc009tjt.1 | 0                       | -0.106958                           | 0        | 0.000094 |
| chrX       | 99043723  | 99045723  | Nhsl2         | uc009tyh.1 | 0                       | -0.059296                           | 0        | 0.000096 |
| chrX       | 136596417 | 136598417 | Nup62cl       | uc009ukv.2 | 0                       | -0.097124                           | 0        | 0.0001   |
| chrX       | 136596417 | 136598417 | E230019M04Rik | uc009ukw.1 | 0                       | -0.097124                           | 0        | 0.0001   |
| chrX       | 160513981 | 160515981 | Siah1b        | uc009uvd.1 | 0                       | -0.084141                           | 0        | 0.000121 |
| chr2       | 32237435  | 32239435  | 1110008P14Rik | uc008jfk.2 | 0                       | 0.076585                            | 0        | 0.000158 |
| chr6       | 83744151  | 83746151  | AK084646      | uc012eob.1 | 0                       | -0.024146                           | 0        | 0.000241 |
| chr6       | 83744151  | 83746151  | Nagk          | uc009coh.2 | 0                       | -0.024146                           | 0        | 0.000241 |
| chr13      | 74454774  | 74456774  | Pdcd6         | uc007rey.2 | 0                       | 0.063527                            | 0        | 0.000247 |
| chr5       | 72950884  | 72952884  | Nfxl1         | uc008xrl.1 | 0                       | 0.059998                            | 0        | 0.000252 |
| chr8       | 13287012  | 13289012  | Dcun1d2       | uc009kxg.1 | 0                       | -0.026856                           | 0        | 0.000252 |
| chr8       | 13287012  | 13289012  | Tmco3         | uc009kxm.1 | 0                       | -0.026856                           | 0        | 0.000252 |
| chr6       | 83744050  | 83746050  | AK084646      | uc012eob.1 | 0                       | -0.02423                            | 0.000001 | 0.000256 |
| chr6       | 83744050  | 83746050  | Nagk          | uc009coh.2 | 0                       | -0.02423                            | 0.000001 | 0.000256 |
| chrX       | 5976262   | 5978262   | Shroom4       | uc009sky.1 | 0                       | -0.061053                           | 0.000001 | 0.000281 |
| chrX       | 74755565  | 74757565  | Tbl1xr1       | uc008osw.1 | 0                       | -0.061412                           | 0.000001 | 0.000282 |
| chrX       | 33867403  | 33869403  | Lonrf3        | uc009sxn.1 | 0                       | -0.066246                           | 0.000001 | 0.000366 |
| chrX       | 68915941  | 68917941  | Gpr50         | uc009tke.1 | 0                       | -0.075654                           | 0.000001 | 0.000371 |
| chr1       | 94370335  | 94372335  | Ndufa10       | uc007cbh.1 | 0                       | -0.02312                            | 0.000001 | 0.000391 |
| chr9       | 82869096  | 82871096  | Phip          | uc009qvv.1 | 0                       | -0.024996                           | 0.000002 | 0.00064  |
| chr11      | 102046570 | 102048570 | Lsm12         | uc007lqs.1 | 0                       | -0.060739                           | 0.000002 | 0.000724 |
| chr1       | 39043658  | 39045658  | Pdcl3         | uc007atc.1 | 0                       | -0.02399                            | 0.000002 | 0.000733 |
| chr1       | 4846774   | 4848774   | Tcea1         | uc007afi.2 | 0                       | -0.020947                           | 0.000002 | 0.000751 |

**Table S7: Reduced representation bisulfite sequencing (RRBS) identified differentially methylated promoters in old father offspring tissue.** RRBS analyses, using hippocampal tissue of 4-weeks-old young and old father offspring mice as starting material (pooling equimolar amounts of DNA of  $n = 10$  mice from 10 litters per group), revealed a set of differentially methylated promoters in old father offspring mice. The table shows the top of the list of genes with differentially methylated promoter regions. Shown are genomic coordinates, gene IDs, methylation differences (old – young),  $P$  values and false discovery rates (FDR).

| Upstream Regulators     | P value of overlap | Molecule Type                       | Predicted Activation |
|-------------------------|--------------------|-------------------------------------|----------------------|
| CTCF                    | 7.74E-07           | transcription regulator             |                      |
| RICTOR                  | 7.20E-06           | other                               |                      |
| ID2                     | 7.95E-06           | transcription regulator             |                      |
| RAD21                   | 8.55E-06           | transcription regulator             |                      |
| 5-azacytidine           | 2.70E-05           | chemical drug                       |                      |
| rapamycin               | 1.14E-04           | chemical drug                       | Inhibited            |
| ID3                     | 1.19E-04           | transcription regulator             |                      |
| kainic acid             | 1.37E-04           | chemical toxicant                   | Activated            |
| CDKN3                   | 1.66E-04           | phosphatase                         |                      |
| HNF4A                   | 1.68E-04           | transcription regulator             |                      |
| HSF1                    | 2.90E-04           | transcription regulator             |                      |
| 1,2-dithiol-3-thione    | 3.01E-04           | chemical reagent                    | Activated            |
| black raspberry extract | 3.10E-04           | chemical drug                       |                      |
| ZFP57                   | 3.13E-04           | transcription regulator             |                      |
| plicamycin              | 3.37E-04           | chemical drug                       |                      |
| POU3F2                  | 3.37E-04           | transcription regulator             |                      |
| HTT                     | 4.07E-04           | transcription regulator             |                      |
| TP53                    | 4.15E-04           | transcription regulator             | Activated            |
| BDNF                    | 4.79E-04           | growth factor                       | Activated            |
| EIF4E                   | 5.61E-04           | translation regulator               | Activated            |
| Vegf                    | 6.79E-04           | group                               |                      |
| flavokawain B           | 7.07E-04           | chemical - endogenous non-mammalian |                      |
| CREB1                   | 8.05E-04           | transcription regulator             | Activated            |
| dexamethasone           | 8.43E-04           | chemical drug                       |                      |
| HIF3A                   | 8.75E-04           | transcription regulator             |                      |

| Top Causal Networks      | P value  | Predicted activation |
|--------------------------|----------|----------------------|
| PHLPP2                   | 1.16E-13 |                      |
| PTPRO                    | 1.30E-13 | Inhibited            |
| CBLC                     | 4.09E-13 | Inhibited            |
| aurinitricarboxylic acid | 2.82E-12 | Activated            |
| Creb                     | 4.08E-12 | Activated            |

| Top Diseases and Disorders          | P value             |
|-------------------------------------|---------------------|
| Cancer                              | 1.14E-02 - 8.62E-19 |
| Organismal Injury and Abnormalities | 1.15E-02 - 8.62E-19 |
| Gastrointestinal Disease            | 9.65E-03 - 3.60E-17 |
| Developmental Disorder              | 1.14E-02 - 2.64E-11 |
| Hereditary Disorder                 | 1.01E-02 - 2.64E-11 |

| Top Molecular and Cellular Functions   | P value             |
|----------------------------------------|---------------------|
| Cellular Growth and Proliferation      | 1.19E-02 - 1.34E-12 |
| Cell Death and Survival                | 1.09E-02 - 9.81E-11 |
| Cell-To-Cell Signaling and Interaction | 8.79E-03 - 5.17E-10 |
| Cellular Assembly and Organization     | 1.10E-02 - 5.17E-10 |
| Cellular Development                   | 1.19E-02 - 2.20E-08 |

| Top Physiological System Development and Function | P value             |
|---------------------------------------------------|---------------------|
| Organismal Survival                               | 4.46E-03 - 2.72E-10 |
| Nervous System Development and Function           | 1.19E-02 - 5.17E-10 |
| Tissue Morphology                                 | 1.15E-02 - 5.17E-10 |
| Tissue Development                                | 1.19E-02 - 2.65E-05 |
| Organismal Development                            | 1.08E-02 - 2.89E-05 |

**Table S8: Pathways, regulators and processes enriched in the gene set with differentially methylated promoters in old father offspring tissue.** The tables show the results of a pathway analysis focusing on the gene set with differentially methylated promoters in old father offspring tissue ( $P < 0.05$ ). They identify upstream regulators predicted to regulate genes with differentially methylated promoters ( $P$  values indicate significance of overlap; shown is also the predicted activation state of the regulator with its gene set), top causal networks predicted to regulate genes with differentially methylated promoters, top diseases and disorders, top molecular and cellular functions, as well as top physiological system development processes and functions with significant enrichment among differentially methylated promoters in aged sperm ( $P$  values refer to  $P$  value ranges, minimal to maximal, of sub-items within the respective category).

| Entrez ID | Gene Symbol   | LogFC (OFO/YFO) | P Value  | FDR      |
|-----------|---------------|-----------------|----------|----------|
| 17528     | Mpz           | 5.51            | 1.90E-19 | 3.23E-15 |
| 20296     | Ccl2          | 2.74            | 2.43E-09 | 2.06E-05 |
| 13107     | Cyp2f2        | 1.95            | 4.15E-08 | 2.35E-04 |
| 434794    | Xlr4a         | -3.10           | 6.75E-08 | 2.86E-04 |
| 15006     | H2-Q1         | 1.33            | 6.18E-07 | 2.10E-03 |
| 64378     | Gpr88         | 0.94            | 6.32E-06 | 1.79E-02 |
| 67639     | 4930474N09Rik | -3.87           | 1.07E-05 | 2.60E-02 |
| 20518     | Slc22a2       | 1.05            | 2.06E-05 | 3.72E-02 |
| 19661     | Rbp3          | 1.46            | 2.11E-05 | 3.72E-02 |
| 56221     | Ccl24         | 1.72            | 2.19E-05 | 3.72E-02 |
| 15160     | Serpind1      | 0.78            | 2.45E-05 | 3.78E-02 |
| 12873     | Cpa3          | 1.42            | 3.25E-05 | 4.60E-02 |
| 16165     | Il13ra2       | 1.14            | 4.10E-05 | 5.36E-02 |
| 100040591 | Kcnj13        | 0.96            | 5.41E-05 | 6.07E-02 |
| 13507     | Dsc3          | 0.81            | 5.56E-05 | 6.07E-02 |
| 14695     | Gnb3          | 1.64            | 5.72E-05 | 6.07E-02 |
| 66715     | Henmt1        | 0.69            | 8.94E-05 | 8.93E-02 |
| 14960     | H2-Aa         | 0.93            | 1.01E-04 | 9.55E-02 |
| 216350    | Tspan8        | 1.41            | 1.37E-04 | 1.22E-01 |
| 211577    | Mrgprf        | 0.69            | 1.80E-04 | 1.52E-01 |
| 629147    | Ctxn3         | 0.74            | 1.98E-04 | 1.60E-01 |
| 27047     | Omd           | 0.74            | 2.11E-04 | 1.62E-01 |
| 12160     | Bmp5          | 0.87            | 2.63E-04 | 1.92E-01 |
| 20306     | Ccl7          | 1.56            | 2.72E-04 | 1.92E-01 |
| 11889     | Asgr1         | 0.87            | 2.97E-04 | 1.96E-01 |
| 22626     | Slc23a3       | 1.26            | 3.00E-04 | 1.96E-01 |
| 71934     | Car13         | 0.81            | 3.19E-04 | 2.00E-01 |
| 71690     | Esm1          | 1.37            | 3.77E-04 | 2.25E-01 |
| 108995    | Tbc1d10c      | -0.86           | 3.86E-04 | 2.25E-01 |
| 22351     | Vill          | 0.73            | 3.98E-04 | 2.25E-01 |
| 17196     | Mbp           | -0.39           | 4.43E-04 | 2.43E-01 |
| 329366    | 4932418E24Rik | -0.88           | 4.69E-04 | 2.49E-01 |
| 208890    | Slc26a7       | 1.21            | 5.37E-04 | 2.76E-01 |
| 234684    | Lrrc29        | -0.62           | 6.25E-04 | 2.99E-01 |
| 12904     | Crabp2        | 0.70            | 6.37E-04 | 2.99E-01 |
| 15957     | Ifit1         | 0.64            | 6.43E-04 | 2.99E-01 |
| 16952     | Anxa1         | 0.64            | 6.52E-04 | 2.99E-01 |
| 381741    | Lrrc43        | -0.73           | 7.35E-04 | 3.28E-01 |
| 14264     | Fmod          | 0.92            | 7.56E-04 | 3.29E-01 |
| 18295     | Ogn           | 0.83            | 7.85E-04 | 3.33E-01 |
| 14181     | Fgfbp1        | 1.09            | 1.04E-03 | 4.23E-01 |
| 21804     | Tgfb1i1       | -0.39           | 1.05E-03 | 4.23E-01 |
| 208164    | Fam180a       | 0.75            | 1.07E-03 | 4.24E-01 |
| 17116     | Mab21l1       | 0.79            | 1.11E-03 | 4.27E-01 |
| 13113     | Cyp3a13       | -0.70           | 1.15E-03 | 4.32E-01 |
| 320460    | Vwc2l         | 0.51            | 1.21E-03 | 4.45E-01 |
| 13836     | Epha2         | -0.66           | 1.35E-03 | 4.87E-01 |
| 69983     | Sis           | -1.11           | 1.46E-03 | 5.01E-01 |
| 381560    | Xkr8          | 0.39            | 1.47E-03 | 5.01E-01 |
| 170484    | Nphs2         | 0.90            | 1.54E-03 | 5.01E-01 |

**Table S9: RNA-seq-based assessment of differential gene expression in young and old father offspring tissue.** The table shows the top differentially expressed genes identified in the context of RNA-seq-based differential expression analyses of young and old father offspring mice (hippocampus of 4 weeks old mice as starting material; YFO,  $n = 6$  mice from 6 litters; OFO,  $n = 6$  mice from 6 litters). Shown are gene IDs,  $\log_2$  fold changes (old father offspring / young father offspring),  $P$  values and false discovery rates (FDR).

| Entrez ID | Gene Symbol   | LogFC (old/young) | P value  | FDR        |
|-----------|---------------|-------------------|----------|------------|
| 11522     | Adh1          | 1.74              | 5.37E-22 | 9.85E-18   |
| 14960     | H2-Aa         | 2.15              | 7.91E-19 | 7.26E-15   |
| 12010     | B2m           | 1.25              | 6.86E-17 | 4.20E-13   |
| 100034251 | Gm11428       | 2.68              | 2.16E-15 | 9.93E-12   |
| 13040     | Ctss          | 2.03              | 1.52E-14 | 5.59E-11   |
| 18295     | Ogn           | 1.31              | 3.50E-11 | 1.07E-07   |
| 53328     | Pgrmc1        | 0.78              | 1.20E-10 | 3.15E-07   |
| 13646     | Klk1b22       | -2.41             | 2.55E-10 | 5.86E-07   |
| 17105     | Lyz2          | 2.23              | 5.58E-10 | 1.14E-06   |
| 17476     | Mpeg1         | 0.96              | 1.06E-09 | 1.95E-06   |
| 278180    | Vsig4         | 3.54              | 1.93E-09 | 3.23E-06   |
| 17110     | Lyz1          | 2.34              | 3.77E-09 | 5.78E-06   |
| 404289    | Vmn1r181      | 1.88              | 5.27E-09 | 7.45E-06   |
| 14969     | H2-Eb1        | 1.97              | 1.07E-08 | 1.40E-05   |
| 23972     | Papss2        | 1.39              | 1.96E-08 | 2.40E-05   |
| 56726     | Sh3bgrl       | 1.07              | 2.51E-08 | 2.88E-05   |
| 19241     | Tmsb4x        | 0.67              | 3.18E-08 | 3.44E-05   |
| 58226     | Cacna1h       | -0.60             | 4.14E-08 | 4.23E-05   |
| 13058     | Cybb          | 1.65              | 6.18E-08 | 5.67E-05   |
| 14758     | Gpm6b         | 0.78              | 6.14E-08 | 5.67E-05   |
| 14961     | H2-Ab1        | 0.95              | 6.69E-08 | 5.85E-05   |
| 14964     | H2-D1         | 1.21              | 1.70E-07 | 0.00014211 |
| 20834     | Znrf4         | -0.61             | 2.48E-07 | 0.00019769 |
| 20307     | Ccl8          | 3.73              | 3.84E-07 | 0.00029401 |
| 56758     | Mbnl1         | 0.82              | 4.40E-07 | 0.00032327 |
| 12009     | Azi1          | -0.65             | 4.81E-07 | 0.00033956 |
| 16619     | Klk1b27       | -1.84             | 9.87E-07 | 0.00066929 |
| 81799     | C1qtnf3       | 0.89              | 1.02E-06 | 0.00066929 |
| 12450     | Ccng1         | 0.93              | 1.17E-06 | 0.00069524 |
| 19652     | Rbm3          | 0.68              | 1.12E-06 | 0.00069524 |
| 68233     | 1700125D06Rik | -0.60             | 1.17E-06 | 0.00069524 |
| 216350    | Tspan8        | 1.48              | 1.70E-06 | 0.00089607 |
| 60440     | ligp1         | 2.40              | 1.67E-06 | 0.00089607 |
| 64291     | Osbpl1a       | -0.58             | 1.71E-06 | 0.00089607 |
| 66141     | Ifitm3        | 1.25              | 1.66E-06 | 0.00089607 |
| 11886     | Asah1         | 0.70              | 1.79E-06 | 0.00091263 |
| 17311     | Kitl          | 0.76              | 2.10E-06 | 0.00101378 |
| 20229     | Sat1          | 1.12              | 2.09E-06 | 0.00101378 |
| 110454    | Ly6a          | 1.32              | 2.82E-06 | 0.00132883 |
| 68339     | Ccdc88c       | -0.54             | 3.03E-06 | 0.00138968 |
| 320590    | Svopl         | 2.00              | 3.46E-06 | 0.00154897 |
| 11815     | Apod          | 1.95              | 4.27E-06 | 0.0018596  |
| 19058     | Ppp3r1        | 0.67              | 4.46E-06 | 0.0018596  |
| 243897    | Ggn           | -0.53             | 4.39E-06 | 0.0018596  |
| 622402    | Akr1c12       | 1.67              | 4.80E-06 | 0.00195899 |
| 14609     | Gja1          | 0.59              | 5.96E-06 | 0.00234161 |
| 239853    | Gpr128        | 1.45              | 5.99E-06 | 0.00234161 |
| 16149     | Cd74          | 1.90              | 6.84E-06 | 0.00261572 |
| 11798     | Xiap          | 0.89              | 7.55E-06 | 0.00282979 |
| 15430     | Hoxd10        | 1.59              | 8.97E-06 | 0.00329415 |

**Table S10: RNA-seq-based assessment of differential gene expression in young vs. old testis.** The table shows the top differentially expressed genes identified in the context of RNA-seq-based differential expression analyses of young (~4 months old,  $n = 2$  mice) vs. old (~24 months old;  $n = 2$  mice) testis. Shown are Entrez ID, gene symbol,  $\log_2$  fold changes (old / young),  $P$  value and false discovery rate (FDR).

| Ensembl ID         | Entrez ID | Gene Symbol   | LogFC ( <i>Tsc2</i> <sup>+/-</sup> /WT) | P value    | FDR        |
|--------------------|-----------|---------------|-----------------------------------------|------------|------------|
| ENSMUSG00000096403 | NA        | NA            | 4.34                                    | 1.50E-92   | 3.65E-88   |
| ENSMUSG00000078249 | 111241    | Hmga1-rs1     | 2.44                                    | 3.13E-19   | 3.83E-15   |
| ENSMUSG00000044533 | 16898     | Rps2          | -0.59                                   | 4.61E-15   | 3.75E-11   |
| ENSMUSG00000002496 | 22084     | Tsc2          | -0.87                                   | 2.11E-13   | 1.29E-09   |
| ENSMUSG00000036775 | 26378     | Decr2         | -0.47                                   | 1.18E-11   | 5.76E-08   |
| ENSMUSG00000075391 | NA        | NA            | 1.47                                    | 9.40E-08   | 0.00038252 |
| ENSMUSG00000096847 | 210573    | Tmem151b      | 0.27                                    | 1.42E-07   | 0.00049565 |
| ENSMUSG00000023046 | 16012     | Igfbp6        | 0.68                                    | 3.12E-07   | 0.00095147 |
| ENSMUSG00000034681 | 19826     | Rnps1         | -0.34                                   | 8.28E-07   | 0.00224584 |
| ENSMUSG00000034614 | 216505    | Pik3ip1       | 0.39                                    | 1.59E-06   | 0.0038929  |
| ENSMUSG00000017802 | 67998     | Fam134c       | 0.23                                    | 1.07E-05   | 0.02238314 |
| ENSMUSG00000000126 | 216795    | Wnt9a         | -0.80                                   | 1.10E-05   | 0.02238314 |
| ENSMUSG00000047415 | 238377    | Gpr68         | 0.46                                    | 1.61E-05   | 0.03027192 |
| ENSMUSG00000033382 | 75964     | Trappc8       | -0.24                                   | 1.93E-05   | 0.0337444  |
| ENSMUSG00000025277 | 66082     | Abhd6         | 0.18                                    | 2.55E-05   | 0.04154688 |
| ENSMUSG00000036054 | 234373    | Sugp2         | -0.25                                   | 2.98E-05   | 0.04552182 |
| ENSMUSG00000019916 | 18451     | P4ha1         | 0.55                                    | 3.46E-05   | 0.0497455  |
| ENSMUSG00000028414 | 246179    | Fktn          | 0.34                                    | 4.00E-05   | 0.05424781 |
| ENSMUSG00000041771 | 238384    | Slc24a4       | 0.34                                    | 4.39E-05   | 0.05646671 |
| ENSMUSG00000097428 | NA        | NA            | -0.67                                   | 5.83E-05   | 0.0685699  |
| ENSMUSG00000090663 | NA        | NA            | -0.27                                   | 5.90E-05   | 0.0685699  |
| ENSMUSG00000060733 | 69718     | lpmk          | 0.33                                    | 6.53E-05   | 0.07138768 |
| ENSMUSG00000026657 | 209630    | Frmd4a        | 0.32                                    | 6.72E-05   | 0.07138768 |
| ENSMUSG00000039057 | 244281    | Myo16         | -0.49                                   | 7.30E-05   | 0.07423206 |
| ENSMUSG00000020486 | 18952     | Sept4         | -0.43                                   | 7.87E-05   | 0.07489319 |
| ENSMUSG00000008136 | 14200     | Fhl2          | -0.27                                   | 8.69E-05   | 0.07489319 |
| ENSMUSG00000046711 | 15361     | Hmga1         | -0.50                                   | 8.69E-05   | 0.07489319 |
| ENSMUSG00000024130 | 27410     | Abca3         | 0.29                                    | 8.86E-05   | 0.07489319 |
| ENSMUSG00000021638 | 18260     | Ocln          | 0.47                                    | 8.92E-05   | 0.07489319 |
| ENSMUSG00000027954 | 13636     | EfnA1         | 0.60                                    | 9.30E-05   | 0.07489319 |
| ENSMUSG00000026864 | 14828     | Hspa5         | 0.43                                    | 9.98E-05   | 0.07489319 |
| ENSMUSG00000026469 | 19775     | Xpr1          | 0.27                                    | 0.0001004  | 0.07489319 |
| ENSMUSG00000035372 | 72056     | 1810055G02Rik | 0.34                                    | 0.00010457 | 0.07489319 |
| ENSMUSG00000022434 | 73225     | Fam118a       | 0.31                                    | 0.00010596 | 0.07489319 |
| ENSMUSG00000024493 | 107045    | Lars          | -0.30                                   | 0.00010736 | 0.07489319 |
| ENSMUSG00000021957 | 21881     | Tkt           | -0.17                                   | 0.00012212 | 0.08282195 |
| ENSMUSG00000003200 | 20405     | Sh3gl1        | 0.25                                    | 0.0001288  | 0.08499091 |
| ENSMUSG00000024991 | 13669     | Eif3a         | -0.33                                   | 0.00014965 | 0.09615274 |
| ENSMUSG00000020522 | 216760    | Mfap3         | 0.46                                    | 0.00016046 | 0.09706953 |
| ENSMUSG00000007038 | 18010     | Neu1          | 0.17                                    | 0.00016136 | 0.09706953 |
| ENSMUSG00000035401 | 233545    | 2210018M11Rik | -0.32                                   | 0.00016322 | 0.09706953 |
| ENSMUSG00000031543 | 11733     | Ank1          | -0.37                                   | 0.00016698 | 0.09706953 |
| ENSMUSG00000033623 | 69587     | Pcgf3         | 0.28                                    | 0.00017597 | 0.09991768 |
| ENSMUSG00000021203 | 68149     | Otub2         | 0.30                                    | 0.00019661 | 0.1090992  |
| ENSMUSG00000022462 | 67760     | Slc38a2       | 0.23                                    | 0.00021407 | 0.11614755 |
| ENSMUSG00000036422 | 18530     | Pcdh8         | 0.34                                    | 0.00022236 | 0.11718945 |
| ENSMUSG00000022314 | 19357     | Rad21         | -0.19                                   | 0.0002287  | 0.11718945 |
| ENSMUSG00000003153 | 20527     | Slc2a3        | 0.19                                    | 0.00023039 | 0.11718945 |
| ENSMUSG00000029804 | 73998     | Herc3         | -0.30                                   | 0.00023641 | 0.11779752 |
| ENSMUSG00000082900 | NA        | NA            | -0.98                                   | 0.00025146 | 0.12279179 |

**Table S11: The Ribotag technology was used to identify genes expressionally regulated, in hippocampal neurons, by a *Tsc2*<sup>+/-</sup> mutation.** In order to identify genes whose expression is regulated in response to overactive mTOR signaling, we combined the Ribotag approach in  $\alpha$ CaMKII-Cre/Ribotag mice, on either a *Tsc2*<sup>+/-</sup> (associated with overactive mTOR signaling) or WT control background and treated with either the pharmacological mTOR inhibitor rapamycin or vehicle control, with an RNA-seq-based differential expression analysis (rapamycin-treated *Tsc2*<sup>+/-</sup>/ $\alpha$ CaMKII-Cre/Ribotag, *n* = 4 mice; vehicle-treated *Tsc2*<sup>+/-</sup>/ $\alpha$ CaMKII-Cre/Ribotag, *n* = 3 mice; rapamycin-treated WT/ $\alpha$ CaMKII-Cre/Ribotag, *n* = 5 mice; vehicle-treated WT/ $\alpha$ CaMKII-Cre/Ribotag, *n* = 5 mice). The table shows the top differentially expressed genes with gene IDs, log<sub>2</sub> fold changes (*Tsc2*<sup>+/-</sup> / WT), *P* values and false discovery rates (FDR).

| Ensembl ID         | Entrez ID | Gene Symbol   | LogFC (rapamycin/vehicle) | P value  | FDR        |
|--------------------|-----------|---------------|---------------------------|----------|------------|
| ENSMUSG00000027035 | 241447    | Cers6         | -0.42                     | 2.28E-10 | 5.57E-06   |
| ENSMUSG00000020362 | 104625    | Cnot6         | -0.54                     | 6.13E-10 | 7.49E-06   |
| ENSMUSG00000045589 | 230235    | Frrs1l        | -0.33                     | 1.24E-09 | 1.01E-05   |
| ENSMUSG00000035614 | 328108    | Fam179b       | -0.53                     | 1.77E-09 | 1.08E-05   |
| ENSMUSG00000025144 | 20892     | Stra13        | 0.70                      | 9.19E-09 | 4.49E-05   |
| ENSMUSG00000014498 | 237615    | Ankrd52       | -0.54                     | 1.35E-08 | 5.49E-05   |
| ENSMUSG00000037896 | 217864    | Rcor1         | -0.51                     | 1.68E-08 | 5.87E-05   |
| ENSMUSG00000023232 | 230779    | Serinc2       | -0.81                     | 3.95E-08 | 9.52E-05   |
| ENSMUSG00000040855 | 194590    | Reps2         | -0.34                     | 4.09E-08 | 9.52E-05   |
| ENSMUSG00000037111 | 73251     | Setd7         | -0.47                     | 4.25E-08 | 9.52E-05   |
| ENSMUSG00000023951 | 22339     | Vegfa         | 0.77                      | 4.29E-08 | 9.52E-05   |
| ENSMUSG00000025277 | 66082     | Abhd6         | -0.27                     | 6.33E-08 | 0.00011929 |
| ENSMUSG00000037172 | 243780    | E330009J07Rik | -0.40                     | 6.35E-08 | 0.00011929 |
| ENSMUSG00000092060 | 666938    | Bend4         | -0.72                     | 7.31E-08 | 0.00012755 |
| ENSMUSG00000049470 | 93736     | Aff4          | -0.37                     | 9.57E-08 | 0.00015582 |
| ENSMUSG00000034845 | 84094     | Plvap         | 0.61                      | 1.02E-07 | 0.00015605 |
| ENSMUSG00000037104 | 56468     | Socs5         | -0.24                     | 1.20E-07 | 0.00016402 |
| ENSMUSG00000063415 | 232174    | Cyp26b1       | -0.91                     | 1.23E-07 | 0.00016402 |
| ENSMUSG00000008136 | 14200     | Fhl2          | 0.41                      | 1.29E-07 | 0.00016402 |
| ENSMUSG00000026623 | 226856    | Lpgat1        | -0.31                     | 1.34E-07 | 0.00016402 |
| ENSMUSG00000031167 | 19652     | Rbm3          | 0.84                      | 1.98E-07 | 0.0002299  |
| ENSMUSG00000073755 | 230757    | 5730409E04Rik | 0.23                      | 2.72E-07 | 0.00030135 |
| ENSMUSG00000021068 | 18080     | Nin           | -0.56                     | 3.24E-07 | 0.0003443  |
| ENSMUSG00000026322 | 15562     | Htr4          | -0.60                     | 4.68E-07 | 0.00047596 |
| ENSMUSG00000030275 | 75320     | Etnk1         | -0.30                     | 5.56E-07 | 0.0005431  |
| ENSMUSG00000052572 | 23859     | Dlg2          | -0.43                     | 6.36E-07 | 0.00058314 |
| ENSMUSG00000040771 | 106821    | Oard1         | 0.51                      | 6.45E-07 | 0.00058314 |
| ENSMUSG00000031652 | 80750     | N4bp1         | -0.35                     | 7.61E-07 | 0.00066383 |
| ENSMUSG00000041132 | 100637    | N4bp2l1       | 0.49                      | 8.03E-07 | 0.0006764  |
| ENSMUSG00000005610 | 13690     | Eif4g2        | -0.26                     | 8.73E-07 | 0.00071058 |
| ENSMUSG00000020990 | 71091     | Cdkl1         | 0.53                      | 1.14E-06 | 0.0008978  |
| ENSMUSG00000016477 | 13557     | E2f3          | -0.38                     | 1.29E-06 | 0.00098724 |
| ENSMUSG00000046062 | 108954    | Ppp1r15b      | -0.29                     | 1.74E-06 | 0.00128729 |
| ENSMUSG00000021796 | 12166     | Bmpr1a        | -0.36                     | 1.86E-06 | 0.001338   |
| ENSMUSG00000035401 | 233545    | 2210018M11Rik | 0.46                      | 2.15E-06 | 0.00146085 |
| ENSMUSG00000036095 | 217480    | Dgkb          | -0.38                     | 2.15E-06 | 0.00146085 |
| ENSMUSG00000022160 | 56335     | Mettl3        | -0.57                     | 2.47E-06 | 0.00160137 |
| ENSMUSG00000018042 | 109754    | Cyb5r3        | 0.33                      | 2.49E-06 | 0.00160137 |
| ENSMUSG00000037253 | 240396    | Mex3c         | -0.49                     | 2.59E-06 | 0.00161927 |
| ENSMUSG00000042599 | 338523    | Jhdm1d        | -0.60                     | 3.14E-06 | 0.00189939 |
| ENSMUSG00000064340 | NA        | NA            | 1.80                      | 3.19E-06 | 0.00189939 |
| ENSMUSG00000040084 | 12236     | Bub1b         | 1.41                      | 3.83E-06 | 0.00222454 |
| ENSMUSG00000008318 | 320100    | Relt          | 0.68                      | 3.97E-06 | 0.00223709 |
| ENSMUSG00000021537 | 12626     | Cetn3         | 0.40                      | 4.03E-06 | 0.00223709 |
| ENSMUSG00000020102 | 20503     | Slc16a7       | -0.60                     | 4.43E-06 | 0.0024026  |
| ENSMUSG00000038121 | 108654    | Fam210a       | -0.33                     | 4.78E-06 | 0.00253721 |
| ENSMUSG00000029436 | 23948     | Mmp17         | -0.30                     | 5.22E-06 | 0.00261281 |
| ENSMUSG00000039648 | 70266     | Ccbl1         | 0.52                      | 5.22E-06 | 0.00261281 |
| ENSMUSG00000032290 | 56294     | Ptpn9         | -0.38                     | 5.24E-06 | 0.00261281 |
| ENSMUSG00000018669 | 80280     | Cdk5rap3      | 0.50                      | 5.87E-06 | 0.00286599 |

**Table S12: The Ribotag technology was used to identify genes expressionally regulated by rapamycin in hippocampal neurons.** In order to identify genes expressionally regulated in response to inhibited mTOR signaling, we combined the Ribotag approach in  $\alpha$ CaMKII-Cre/Ribotag mice, on either a *Tsc2*<sup>+/-</sup> or WT background and treated with either the pharmacological mTOR inhibitor rapamycin or vehicle control, with an RNA-seq-based differential expression analysis (rapamycin-treated *Tsc2*<sup>+/-</sup>/ $\alpha$ CaMKII-Cre/Ribotag, *n* = 4 mice; vehicle-treated *Tsc2*<sup>+/-</sup>/ $\alpha$ CaMKII-Cre/Ribotag, *n* = 3 mice; rapamycin-treated WT/ $\alpha$ CaMKII-Cre/Ribotag, *n* = 5 mice; vehicle-treated WT/ $\alpha$ CaMKII-Cre/Ribotag, *n* = 5 mice). The table shows the top differentially expressed genes with gene IDs, log<sub>2</sub> fold changes (rapamycin / vehicle control), *P* values and false discovery rates (FDR).



| Entrez ID | Gene Symbol | LogFC (old/young) | FDR         |
|-----------|-------------|-------------------|-------------|
| 17105     | Lyz2        | 3.19              | 0           |
| 19144     | Klk6        | 4.27              | 0           |
| 23962     | Oasl2       | 2.09              | 0           |
| 93695     | Gpnmb       | 1.77              | 0           |
| 22041     | Trf         | 1.25              | 0           |
| 14580     | Gfap        | 1.43              | 0           |
| 15957     | Ifit1       | 2.19              | 0           |
| 17110     | Lyz1        | 3.10              | 0           |
| 17476     | Mpeg1       | 1.63              | 0           |
| 20750     | Spp1        | 2.05              | 0           |
| 12260     | C1qb        | 1.38              | 0           |
| 56644     | Clec7a      | 4.49              | 0           |
| 13011     | Cst7        | 4.75              | 0           |
| 13040     | Ctss        | 1.37              | 0           |
| 11815     | Apod        | 1.63              | 0           |
| 22177     | Tyrobp      | 1.46              | 0           |
| 12266     | C3          | 2.86              | 0           |
| 13058     | Cybb        | 3.01              | 0           |
| 16411     | Itgax       | 4.09              | 0           |
| 12268     | C4b         | 2.45              | 0           |
| 23833     | Cd52        | 2.56              | 0           |
| 15959     | Ifit3       | 1.57              | 0           |
| 20716     | Serpina3n   | 1.77              | 0           |
| 104816    | Aspg        | 1.95              | 0           |
| 68794     | Flnc        | 1.77              | 0           |
| 22352     | Vim         | 1.27              | 0           |
| 14728     | Lilrb4      | 3.59              | 0           |
| 12259     | C1qa        | 1.27              | 0           |
| 20200     | S100a6      | 1.41              | 0           |
| 76933     | Ifi2712a    | 2.49              | 0           |
| 83433     | Trem2       | 1.34              | 0           |
| 12262     | C1qc        | 1.26              | 0           |
| 12514     | Cd68        | 1.50              | 0           |
| 54123     | Irf7        | 1.92              | 0           |
| 18173     | Slc11a1     | 1.94              | 0           |
| 14964     | H2-D1       | 1.20              | 0           |
| 19039     | Lgals3bp    | 1.22              | 0           |
| 21816     | Tgm1        | 3.08              | 0           |
| 17085     | Ly9         | 2.98              | 0           |
| 20302     | Ccl3        | 3.04              | 0           |
| 100038882 | Isg15       | 1.88              | 0           |
| 14275     | Folr1       | -1.45             | 0           |
| 12267     | C3ar1       | 1.88              | 0           |
| 66141     | Ifitm3      | 1.23              | 0           |
| 16414     | Itgb2       | 1.42              | 0           |
| 12010     | B2m         | 1.08              | 0           |
| 16854     | Lgals3      | 1.63              | 0           |
| 19264     | Ptpnc       | 1.49              | 0.000000001 |
| 22139     | Ttr         | -1.03             | 0.000000001 |
| 12523     | Cd84        | 1.64              | 0.000000001 |

**Table S13: Differentially expressed genes in the aged hippocampus.** The table shows the top differentially expressed genes in aged hippocampus (~24 months old;  $n = 2$  mice) vs. young hippocampus (~4 months old;  $n = 2$  mice) as revealed by an RNA-seq analysis of young vs. old rapamycin or vehicle control-treated animals. Listed are gene IDs,  $\log_2$  fold changes (old / young) and false discovery rates (FDR).

| Entrez ID | Gene Symbol   | LogFC (rapamycin/vehicle) | FDR         |
|-----------|---------------|---------------------------|-------------|
| 73870     | 4930417O13Rik | 1.49                      | 0.000000000 |
| 243676    | E330021D16Rik | 1.66                      | 0.000000000 |
| 108043    | Chrn3         | 1.65                      | 0.000000000 |
| 68750     | Rreb1         | 1.19                      | 0.000000000 |
| 226040    | E030010A14Rik | 2.28                      | 0.000000000 |
| 50720     | Sacs          | 1.33                      | 0.000000088 |
| 70358     | Steap1        | -1.45                     | 0.000009483 |
| 12031     | Bc1           | 1.52                      | 0.000009525 |
| 110257    | Hba-a2        | 0.92                      | 0.000013138 |
| 71236     | Rtdr1         | 1.20                      | 0.000037990 |
| 338346    | Gpr21         | 1.95                      | 0.000038771 |
| 18763     | Pkd1          | 0.82                      | 0.000042376 |
| 100503605 | Beta-s        | 0.83                      | 0.000055989 |
| 630084    | Pol           | 0.79                      | 0.000081849 |
| 20370     | Sez6          | 0.77                      | 0.000146641 |
| 20665     | Sox10         | -0.83                     | 0.000185528 |
| 17441     | Mog           | -0.80                     | 0.000196836 |
| 71898     | Apol9b        | 3.27                      | 0.000197033 |
| 18606     | Enpp2         | -0.77                     | 0.000197033 |
| 71939     | Apol6         | 1.28                      | 0.000259079 |
| 14618     | Gjb1          | -0.94                     | 0.000268432 |
| 17105     | Lyz2          | -0.84                     | 0.000285046 |
| 20190     | Ryr1          | 0.78                      | 0.000417728 |
| 320429    | Trank1        | 0.73                      | 0.000428137 |
| 19144     | Klk6          | -0.96                     | 0.000473141 |
| 23962     | Oasl2         | 1.01                      | 0.000473141 |
| 100038882 | Isg15         | 1.24                      | 0.000473141 |
| 18417     | Cldn11        | -0.73                     | 0.000473141 |
| 15129     | Hbb-b1        | 0.84                      | 0.000473141 |
| 338521    | Fa2h          | -0.82                     | 0.000473141 |
| 100041581 | Zkscan16      | 0.83                      | 0.000544837 |
| 12153     | mKIAA4159     | 0.74                      | 0.000544837 |
| 17153     | Mal           | -0.71                     | 0.000592810 |
| 93695     | Gpnmb         | -0.89                     | 0.000603285 |
| 18823     | Plp1          | -0.70                     | 0.000618630 |
| 22041     | Trf           | -0.70                     | 0.000854865 |
| 574402    | Gpr17         | -0.78                     | 0.000897639 |
| 68144     | 5031426D15Rik | 0.98                      | 0.000897639 |
| 77125     | Il33          | -0.71                     | 0.001082249 |
| 320587    | Tmem88b       | -0.71                     | 0.001132234 |
| 230379    | Acer2         | 0.97                      | 0.001132234 |
| 22239     | Ugt8a         | -0.74                     | 0.001365907 |
| 53608     | Map3k6        | 0.93                      | 0.001622770 |
| 19090     | Prkdc         | 0.70                      | 0.002264001 |
| 63830     | Kcnq1ot1      | 0.68                      | 0.002301681 |
| 72690     | Grrp1         | 1.25                      | 0.002301681 |
| 12799     | Cnp           | -0.66                     | 0.002365299 |
| 12289     | cacna1d       | 0.69                      | 0.002365299 |
| 17136     | Mag           | -0.66                     | 0.002368330 |
| 16177     | Il1r1         | 0.77                      | 0.002495247 |

**Table S14: Differentially expressed genes in response to rapamycin treatment.** The table shows the top differentially expressed genes in the hippocampus of rapamycin-treated animals ( $n = 2$  mice) vs. vehicle control mice ( $n = 2$  mice) as identified by an RNA-seq analysis of young (~4 months) vs. old (~24 months) rapamycin or vehicle control-treated animals. Shown are gene IDs,  $\log_2$  fold changes (old / young) and false discovery rates (FDR).
